1

2

3                   **The Atypical Cyclin-Like Protein Spy1 Overrides p53-Mediated Tumour**  
4                   **Suppression and Promotes Susceptibility to Breast Tumorigenesis**

5

6

7

8

9

10 Bre-Anne Fifield<sup>1</sup>, Ingrid Qemo<sup>1</sup>, Evie Kirou<sup>1</sup>, Robert D. Cardiff<sup>2</sup> and Lisa Ann Porter<sup>1\*</sup>

11

12 \*Corresponding author

13

14

15 <sup>1</sup>Department of Biological Sciences

16 University of Windsor

17 Windsor, ON N9B 3P4

18

19 <sup>2</sup>Center of Comparative Medicine

20 University of California

21 Davis, CA, USA

22

23 fifield@uwindsor.ca

24 qemo@uwindsor.ca

25 ekirou@gmail.com

26 rdcardiff@ucdavis.edu

27 lporter@uwindsor.ca

28

29 **Running title: Elevated Levels of the Cyclin-Like Protein Spy1 Promotes**  
30 **Susceptibility to Mammary Carcinoma**

31

32

33

34

35

36

37

38

39

40

41

42 **Word count:** 5,882    **Number of Figures:** 7 (+ 5 supplementary figures)

43

44 **Abstract**

45 **Background:** Breast cancer is the most common cancer to affect women and one of the  
46 leading causes of cancer related deaths. Proper regulation of cell cycle checkpoints plays  
47 a critical role in preventing the accumulation of deleterious mutations. Perturbations in  
48 the expression or activity of mediators of cell cycle progression or checkpoint activation  
49 represent important events that may increase susceptibility to the onset of carcinogenesis.  
50 The atypical cyclin-like protein Spy1 was isolated in a screen for novel genes that could  
51 bypass the DNA damage response. Clinical data demonstrates that protein levels of Spy1  
52 are significantly elevated in ductal and lobular carcinoma of the breast. We hypothesized  
53 that elevated Spy1 would override protective cell cycle checkpoints and support the onset  
54 of mammary tumorigenesis.

55 **Methods:** We generated a transgenic mouse model driving expression of Spy1 in the  
56 mammary epithelium. Mammary development, growth characteristics and susceptibility  
57 to tumorigenesis was studied. *In vitro* studies were conducted to investigate the  
58 relationship between Spy1 and p53.

59 **Results:** We found that in the presence of wild-type p53, Spy1 protein is held ‘in check’  
60 via protein degradation, representing a novel endogenous mechanism to ensure protected  
61 checkpoint control. Regulation of Spy1 by p53 is at the protein level and is mediated in  
62 part by Nedd4. Mutation or abrogation of p53 is sufficient to allow for accumulation of  
63 Spy1 levels resulting in mammary hyperplasia. Sustained elevation of Spy1 results in  
64 elevated proliferation of the mammary gland and susceptibility to tumorigenesis.

65 **Conclusions:** This mouse model demonstrates for the first time that degradation of the  
66 cyclin-like protein Spy1 is an essential component of p53-mediated tumour suppression.

67 Targeting cyclin-like protein activity may therefore represent a mechanism of re-  
68 sensitizing cells to important cell cycle checkpoints in a therapeutic setting.

69 **Keywords:** Cdk, Cyclin, cell cycle, tumour suppressor, mammary gland, DNA damage

70

## 71 **Introduction**

72 Breast cancer is the most prevalent form of cancer to affect women and represents the  
73 second leading cause of cancer related mortality among this population. Increased  
74 incidence of breast cancer in women can be attributed to the complex cellular changes the  
75 female mammary gland undergoes throughout life in response to hormonal cues. A  
76 delicate balance of cell cycle progression and inhibition is required at each of these  
77 periods of development to ensure maintenance of genomic stability; a crucial factor in the  
78 inhibition of tumourigenesis. Women with inherited mutations in genes that play  
79 fundamental roles in recognition of DNA damage and activation of DNA repair pathways  
80 have an elevated risk of breast cancer. Hence understanding how mammary epithelial  
81 cells monitor and respond to changes in genomic instability throughout development may  
82 reveal novel factors that predispose women to carcinogenesis.

83 The tumour suppressor p53 plays a critical role in DNA repair mechanisms,  
84 functioning to initiate arrest, repair and apoptotic programs [1-4]. Over 50% of human  
85 cancers contain a mutation in the *TP53* gene; individuals with Li-Fraumeni syndrome  
86 harbouring germline mutations in *TP53* are at an increased risk of developing cancer,  
87 including breast cancer, and mouse models with germline knockout of p53 develop  
88 normally however spontaneous tumours occur at an increased rate [5-10]. Thus, the  
89 inability of a cell to efficiently recognize and repair DNA damage plays a key role in the

90 onset of tumorigenesis. Although p53 is widely mutated in human cancers and  
91 individuals with Li-Fraumeni syndrome have an elevated risk of breast cancer, this  
92 population comprises a small percentage of those with breast cancer, stressing the  
93 importance for cooperating genes in the initiation and/or progression of disease [11]. It is  
94 likely that these genes also play critical roles in normal cellular events that regulate  
95 proliferation, checkpoint activation and detection and repair of DNA damage, as aberrant  
96 expression of such genes would lead to genomic instability. Thus, it is of high importance  
97 to identify additional genes that may be implicated in breast cancer susceptibility.

98         An atypical cyclin-like protein Spy1 (also called Ringo, Speedy1; gene SPDYA)  
99 was initially discovered in a screen for genes that would override cell death following  
100 ultraviolet (UV) radiation in a rad1 deficient strain of *S. pombe*, suggesting a role for this  
101 protein in overriding critical checkpoint responses following DNA damage [12]. Several  
102 groups have demonstrated that Spy1 is capable of inhibiting apoptosis and promoting  
103 progression through both G1/S and G2/M phase of the cell cycle [13-16]. Spy1 function  
104 is currently attributed to the direct binding to the cyclin dependent kinases (Cdks),  
105 activating both Cdk1 and Cdk2 independent of threonine 161/160 phosphorylation status  
106 [14-19]. In the mammary gland, Spy1 protein levels are tightly regulated through  
107 development, being high during proliferative stages and downregulated at the onset of  
108 differentiation [20]. Interestingly, levels rise at the onset of involution, a period of  
109 development characterized by apoptosis and the triggering of regenerative processes [20].  
110 When overexpressed in immortalized cells with a mutated p53 and transplanted in cleared  
111 fat pad assays, elevated levels of Spy1 protein leads to precocious development of the  
112 mammary gland, disrupts normal morphogenesis and accelerates mammary

113 tumorigenesis [20]. Spy1 is elevated in human breast cancer [21, 22], as well as several  
114 other forms of cancer including brain, liver, and blood [23-25]. The ability of Spy1 to  
115 both enhance proliferation and override apoptosis and critical checkpoint responses  
116 provides further support for this finding. Spy1 may serve as an important mediator of the  
117 DNA damage response (DDR) in maintaining the proper balance of cellular proliferation;  
118 thus, deregulation of Spy1 may play a crucial role in the transition from precancerous to  
119 cancerous cell.

120 In this work we drive Spy1 overexpression in the mammary gland using the  
121 mouse mammary tumour virus (MMTV) promoter (MMTV-Spy1). We find that while  
122 glands are significantly more proliferative, there is no gross overall defect or pathology to  
123 the gland. Importantly, when hit with chemical carcinogens MMTV-Spy1 mice  
124 accumulate more DNA damage and have elevated susceptibility to mammary tumour  
125 formation. We noted that in this model endogenous wild-type-p53 was capable of  
126 keeping levels of Spy1 protein in check. We proceed to demonstrate a novel negative  
127 feedback loop with p53. This work demonstrates that tight regulation over the levels of  
128 cyclin-like proteins is a critical component of mammary tumour suppression and loss of  
129 control promotes hyperplastic growth and tumour initiation in the breast.

## 130 **Materials and Methods**

### 131 *Construction of Transgene*

132 The MMTV-Spy1 transgene was prepared as follows. Site directed mutagenesis was  
133 utilized to create an additional EcoRI site in Flag-Spy1A-pLXSN [26] to allow for  
134 subsequent removal of the Spy1 coding sequence using EcoRI digestion. The MMTV-  
135 SV40-TRPS-1 vector (kind gift from Dr Gabriel E DiMattia) was digested with EcoRI to

136 remove the TRPS-1 coding sequence to allow for subsequent ligation of the Spy1 coding  
137 sequence into the MMTV-SV40 backbone.

#### 138 *Generation and Maintenance of MMTV-Spy1 Transgenic Mice*

139 MMTV-Spy1 (B6CBAF1/J-Tg(MMTV-Spy1)1Lport319, B6CBAF1/J-Tg(MMTV-  
140 Spy1)1Lport410, and B6CBAF1/J-Tg(MMTV-Spy1)1Lport413) mice were generated as  
141 follows: the MMTV-Spy1 vector was digested with XhoI and SpeI to isolate the MMTV-  
142 Spy1 transgene fragment and remove the remainder of the vector backbone. The  
143 transgene was sent to the London Regional Transgenic and Gene Targeting Facility for  
144 pronuclear injections in B6CBAF1/J hybrid embryos. Identification of founders and  
145 subsequent identification of positive pups was performed by PCR analysis. PCR was  
146 performed by adding 50 ng of genomic tail DNA to a 25 $\mu$ L reaction (1x PCR buffer,  
147 2mM MgSO<sub>4</sub>, 0.2mM dNTP, 0.04U/ $\mu$ L BioBasic Taq Polymerase, 0.4 $\mu$ M forward  
148 primer [5'CCCAAGGCTTAAGTAAGTTTTTGG 3'], 0.4 $\mu$ M reverse primer [5'  
149 GGGCATAAGCACAGATAAAACACT 3'], 1% DMSO) (NCI Mouse Repository).  
150 Cycling conditions were as follows: 94°C for 3 minutes, 40 cycles of 94°C for 1 minute,  
151 55°C for 2 minutes, and 72°C for 1 minute, and a final extension of 72°C for 3 minutes.  
152 Mice were maintained hemizygotously following the Canadian Council on Animal Care  
153 Guidelines under animal utilization protocol 14-22 approved by the University of  
154 Windsor.

#### 155 *Primary Cell Harvest and Culture*

156 Mammary tissue of the inguinal mammary gland was dissected and primary mammary  
157 epithelial cells were isolated as described [27]. Cells were also seeded on attachment  
158 plates in media containing 5% fetal bovine serum, 5 ng/mL EGF, 5  $\mu$ g/mL insulin, 50

159  $\mu\text{g}/\text{mL}$  gentamycin, 1% penicillin/streptomycin (P/S) in DMEM-F12 for BrdU  
160 incorporation assays conducted 1 week after isolation of the cells.

### 161 *Mammary Fat Pad Transplantation*

162 The p53 knockout mouse, B6.129S2-Trp53tm1Tyj/J, was purchased from Jackson  
163 Laboratory (002101) [10]. Mammary epithelial cells were isolated from 8 week old mice  
164 and transplanted into the cleared glands of 3 week old B6CBAF1/J females. Successful  
165 clearing was monitored via the addition of a cleared gland with no injected cells.

### 166 *Cell Culture*

167 Human embryonic kidney cells, HEK-293 (CRL-1573; ATCC), MDA-MB-231 (HTB-  
168 26; ATCC) and MCF7 (HTB-22; ATCC) were cultured in Dulbecco's Modified Eagle's  
169 Medium (DMEM; D5796; Sigma Aldrich) supplemented with 10% fetal bovine serum  
170 (FBS; F1051; Sigma Aldrich) and 10% calf serum (C8056; Sigma Aldrich) respectively,  
171 and 1% P/S. Mouse mammary epithelial cells, HC11 (provided by Dr. C. Shemanko)  
172 were maintained in RPMI supplemented with 10% newborn calf serum, 5  $\mu\text{g}/\text{mL}$  insulin,  
173 10 ng/mL EGF and 1% penicillin/streptomycin. All cell lines were maintained at 5%  $\text{CO}_2$   
174 at 37°C. A BioRad TC10 Automated Cell Counter was used to assess cell viability via  
175 trypan blue exclusion. MG132 (Sigma Aldrich) was used at a concentration of 10  $\mu\text{M}$ ,  
176 and was added 12-16 hours post transfection. Cell lines purchased from ATCC were  
177 authenticated via ATCC. Cells were subject to routine mycoplasma testing. All cell lines  
178 were used within 3 passages of thawing.

### 179 *Plasmids*

180 The pEIZ plasmid was a kind gift from Dr B. Welm, and the pEIZ-Flag-Spy1 vector was  
181 generated as previously described [24]. pCS3 and Myc-Spy1-pCS3 plasmids were

182 generated as previously described [14], the Myc-Spy1-TST pCS3 plasmid was generated  
183 as previously described [28], and the p53-GFP backbone was purchased from Addgene  
184 (11770) (p53-GFP was a gift from Geoff Wahl (Addgene plasmid #11770)), (12091)  
185 (GFP-p53 was a gift from Tyler Jacks (Addgene plasmid #12091))[29]. The Nedd4DN  
186 vector was a kind gift from Dr. Dale S. Haines (Temple University School of Medicine).  
187 CMV10-3xFlag Skp2 delta-F was a gift from Sung Hee Baek (Addgene plasmid #  
188 81116) [30].

### 189 *DMBA Treatments*

190 Mice were given 1 mg of DMBA (Sigma Aldrich) in 100 $\mu$ L of a sesame:corn oil mixture  
191 (4:1 ratio) via oral gavage once per week. Treatment began when mice reached 8 weeks  
192 of age and were continued for 6 consecutive weeks. Mice were monitored on a weekly  
193 basis for the presence of tumours via palpitations. Mice were humanely sacrificed when  
194 tumours were noted, and all mice were sacrificed by 8 months of age regardless of  
195 tumour formation. Tissues were collected from sacrificed mice and flash frozen for  
196 immunoblotting and qRT-PCR analysis, or fixed in formalin for immunohistochemistry.  
197 DMBA was dissolved in DMSO for all *in vitro* experiments and used at a final  
198 concentration of 1.5  $\mu$ g/mL.

### 199 *Histology and Immunostaining*

200 Tissue was collected and fixed in 10% neutral buffered formalin. Immunohistochemistry  
201 was performed as described [31]. All primary antibodies were diluted in 3% BSA-0.1%  
202 Tween-20 in 1x PBS with the exception of mouse antibodies, which were diluted with  
203 Mouse on Mouse (MOM) blocker (Biocare Medical). Primary antibodies used were as  
204 follows: Spy1 (1:200; PA5-29417; Thermo Fisher Scientific), BrdU (1:200; 555627; BD



205 Bioscience),  $\gamma$ H2AX (1:200; 05-636; Millipore) Nedd4 (1:200; MBS9204431;  
206 MyBioSource), PCNA (1:500; sc-9857; Santa Cruz), and cleaved-caspase 3 (1:250; 9661;  
207 Cell Signaling). Secondary antibodies were used at a concentration of 1:750 and were as  
208 follows: Biotinylated anti-mouse, biotinylated anti-goat and biotinylated anti-rabbit  
209 (Vector Laboratories). Slides were imaged using the LEICA DMI6000 inverted  
210 microscope with LAS 3.6 software.

### 211 *Whole Mount Analysis*

212 Briefly, the inguinal mammary gland was spread onto a positively charged slide  
213 (Fisherbrand 12-550-15) and left in Clarke's Fluid (75% ethyl alcohol, 25% acetic acid)  
214 overnight. The following day, glands were placed in 70% ethyl alcohol for 30 minutes  
215 before being stained in carmine alum (0.2% carmine, 0.5% potassium aluminum  
216 sulphate) overnight. Glands were destained for 4 to 6 hours with destaining solution (1%  
217 HCl, 70% ethyl alcohol) and subsequently dehydrated in ascending concentrations of  
218 alcohol (15 minutes each 70, 95, 100% ethyl alcohol) before being cleared in xylene  
219 overnight. Slides were mounted with Permount toluene solution (Fisher Scientific)  
220 before imaging on a Leica MZFLIII dissecting microscope (University of Windsor).  
221 Images were captured using Northern Eclipse software.

### 222 *Transfection and Infection*

223 MDA-MB-231 and MCF7 mammary cell lines were transiently transfected in serum and  
224 antibiotic free media using 25  $\mu$ g of polyethylenimine (PEI) and 12  $\mu$ g of plasmid DNA,  
225 incubated at room temperature for 10 minutes in base media before being added to the  
226 plate. For transfection of HC11 cells, media was changed to serum and antibiotic free  
227 media 4 hours prior to transfection. After 4 hours, 28  $\mu$ g of PEI and 12  $\mu$ g of plasmid

228 DNA were incubated at room temperature for 10 minutes in base media before being  
229 added to the plate. Transfection of HEK-293 cells was performed in full growth media  
230 with 25 ug of PEI and 10 ug of plasmid DNA. For all cell lines transfection reagent was  
231 left for 16-18 hours.

232 Transfection of primary mouse cell lines with sip53 (Santa Cruz) and siRNA  
233 control (Santa Cruz) was performed using siRNA Transfection Reagent (Santa Cruz) as  
234 per manufacturer's instructions.

#### 235 *UV Irradiation*

236 Media was removed from exponentially growing cells and cells were washed once with  
237 1X PBS and subjected to 254 nm of UV radiation using a GS Gene Linker (Bio Rad).  
238 Immediately following irradiation, fresh medium was added to the cells.

#### 239 *Quantitative Real Time PCR Analysis*

240 RNA was isolated using Qiagen RNeasy Plus Mini Kit as per manufacturer's  
241 instructions. cDNA was synthesized using Superscript II (Invitrogen) as per  
242 manufacturer's instructions. SYBR Green detection (Applied Biosystems) was used for  
243 real time PCR and was performed and analyzed using Viiia7 Real Time PCR System (Life  
244 Technologies) and software.

#### 245 *Protein Isolation and Immunoblotting*

246 Tissue lysis buffer (50mM Tris-HCl pH 7.5, 1% NP-40, 0.25% Na-deoxycholate, 1mM  
247 EGTA, 0.2% SDS, 150mM NaCl) with protease inhibitors (leupeptin 2 µg/mL, aprotinin  
248 5 µg/mL, PMSF 100 µg/mL) was added to flash frozen tissue. Tissue and lysis buffer  
249 were homogenized on ice using a Fisher Scientific Sonic Dismembrator 50. Samples  
250 were centrifuged at 13000rpm for 20 minutes at 4°C. Supernatant was collected and

251 centrifuged again at 13000rpm for 20 minutes at 4°C. Supernatant was collected and  
252 stored at -20°C until future use. Cells were lysed with TNE buffer (50 mM Tris, 150mM  
253 NaCl, 5mM EDTA) with protease inhibitors (leupeptin 2 µg/mL, aprotinin 5 µg/mL,  
254 PMSF 100 µg/mL). Cells were lysed for 10 minutes on ice, centrifuged at 4°C at  
255 10,000rpm for 10 minutes, and supernatant was collected and stored at -20°C until further  
256 use.

257 Protein concentrations were assessed using the Bradford assay as per  
258 manufacturer's instructions. Equal amounts of protein were analyzed and separated using  
259 SDS-PAGE and transferred to PVDF membranes. Membranes were blocked for 1 hour  
260 at room temperature in 1% BSA and incubated in primary antibody overnight at 4°C.  
261 Primary antibodies were used at a concentration of 1:1000 and were as follows: Actin  
262 (MAB1501; Millipore), p53 (ab131442; Abcam), Spy1 (ab153965; Abcam), c-Myc  
263 (C3956; Sigma Aldrich), Flag (F1804; Sigma Aldrich), Nedd4 (MBS9204431;  
264 MyBioSource). Secondary antibody mouse or rabbit IgG (Sigma Aldrich) at a  
265 concentration of 1:10,000 was used for 1 hour at room temperature. Visualization was  
266 conducted using chemiluminescent peroxidase substrate (Pierce) as per manufacturer's  
267 instructions. Images were captured on Alpha Innotech HD 2 using AlphaEase FC  
268 software.

#### 269 *BrdU Incorporation Assay*

270 15,000 cells per well were seeded in a 96 well plate. BrdU (BD Pharmingen) was added  
271 24 hours later to a final concentration of 10 µM and cells were incubated in media  
272 containing BrdU for 24 hours at 37°C, 5% CO<sub>2</sub>. Media containing BrdU was removed  
273 and cells were washed three times with 1x PBS. Cells were fixed in 4% PFA for 15

274 minutes, washed twice with 1xPBS, incubated for 20 minutes at 37°C in 2M HCl and  
275 subsequently washed once with 1x PBS. Cells were incubated for 45 minutes with Anti-  
276 BrdU (BD Biosciences) in 0.2% Tween in 1x PBS. Cells were washed with 1x PBS and  
277 incubated with anti-mouse IgG and hoescht at a 1:1000 dilution in 1x PBS for 1 hour at  
278 room temperature. Cells were washed one time with 1x PBS, once with distilled water  
279 and stored at 4°C in 50% glycerol until imaged using the LEICA DMI6000 inverted  
280 microscope.

### 281 *Flow Cytometry*

282 Mammary primary epithelial cells were isolated from inguinal glands as described (27).  
283 Cells were stained using CD24 (APC; BD 562349) and CD45 (PeCy7; BD 552848), and  
284 FACS was performed using a BD LSR Fortessa X-20 (Becton Dickinson).

### 285 *Statistical Analysis*

286 For tumour studies, a Mann-Whitney test was performed for statistical analysis. For all  
287 other data, a Student's T-Test was performed. Unequal variance was assumed for  
288 experiments involving mouse tissue samples and primary mammary epithelial cells. Cell  
289 line data analysis assumed equal variance. All experiments, both *in vitro* and *in vivo*,  
290 included at least 3 biological replicates and results are representative of at least 3  
291 experimental replicates. No randomization or blinding occurred for animal studies.  
292 Significance was scored as \* $p < 0.05$ , \*\* $p < 0.01$ , \*\*\* $p < 0.001$ .

293 See supplemental information for more materials and methods.

## 294 **Results**

295 *Generation of MMTV-Spy1 transgenic mice.*

296 The flag-Spy1 coding sequence was cloned into the MMTV-SV40 plasmid (Figure 1A)  
297 and injected into B6CBAF1/J pronuclei. PCR analysis identified three founders, with 5 to  
298 15 copies of the transgene (data not shown), all of which successfully transmitted the  
299 transgene to their progeny (Figure S1A). Analysis of both mRNA and protein levels from  
300 6-week-old mice revealed that mammary glands from MMTV-Spy1 mice contained  
301 significantly higher levels of Spy1 as compared to control littermates (Figure S1B).  
302 Western blot analysis of other tissues in the MMTV-Spy1 mice did not demonstrate  
303 significant elevation of Spy1 (Figure S1C).

304 Previous data demonstrated that increased levels of Spy1 in immortalized  
305 ‘normal’ mouse mammary cells (HC11 cells) transplanted into cleared fat pads can  
306 disrupt morphology of the mammary gland and promote accelerated development *in vivo*  
307 [20]. Histopathological analysis of MMTV-Spy1 glands during puberty revealed modest  
308 phenotypic changes in the gland including a thickening of the ductal walls and some  
309 abnormal, proliferative characteristics (Figures 1C black arrowheads). Additionally, Spy1  
310 appeared to be expressed primarily in luminal cells and showed varying expression in  
311 myoepithelial cells (Figures 1B, S1D). Flow cytometry was used to delineate between  
312 basal and luminal populations of cells as described [32] and while there does appear to be  
313 increases in epithelial content, no significant difference was observed (Figure S1E).  
314 Gross morphology of the gland was not altered in whole mount analysis or histological  
315 analysis at any developmental time point analysed (Figures S2A,B,C). All MMTV-Spy1  
316 female mice successfully nursed their litters, even following multiple rounds of  
317 pregnancy and there were no tumours noted when mice were aged for 2 years.

318           Spy1 increases cell proliferation in a variety of cell types when exogenously  
319 expressed [14, 22]. To determine if MMTV-Spy1 mammary glands exhibited increased  
320 rates of proliferation, immunohistochemical analysis was performed to examine the  
321 expression of PCNA throughout a developmental time course. MMTV-Spy1 mice had  
322 significantly more PCNA positive cells than their littermate controls indicating increased  
323 proliferation at all points examined except for day 4 of involution (Figure 1D,F,S3). To  
324 determine if there was a bone fide increase in proliferation with no subsequent increase in  
325 apoptosis to counterbalance enhanced proliferation, glands were analyzed for expression  
326 of cleaved-caspase 3. No differences in cleaved-caspase 3 were detected at 12 weeks, day  
327 16.5 pregnancy or during lactation; however, a significant reduction in apoptosis was  
328 seen at 8 weeks and day 4 of involution (Figure 1E,F,S3). This suggests that Spy1 is  
329 capable of not only enhancing proliferation but also overriding apoptosis in an *in vivo*  
330 setting. To further validate this finding, primary mammary epithelial cells were isolated  
331 from the inguinal mammary glands of control and MMTV-Spy1 mice and treated with  
332 BrdU. Cells from MMTV-Spy1 inguinal mammary glands were found to have a  
333 significantly higher percentage of BrdU positive cells (Figure S2D). Hence, MMTV-  
334 Spy1 mice display modest phenotypic and no gross morphological changes in the  
335 mammary gland despite having enhanced proliferation and decreased apoptosis.

336 *Spy1 increases mammary tumour susceptibility.*

337 Although MMTV-Spy1 mammary glands exhibit significant changes in proliferative  
338 capacity, they develop normally and do not present with spontaneous tumours. Increased  
339 protein levels of Spy1 have been implicated in several human cancers including that of  
340 the breast, ovary, liver and brain [20, 22-24]. To assess whether or not elevated levels of

341 *Spy1* may affect tumour susceptibility, MMTV-*Spy1* mice and control littermates were  
342 treated with the mammary carcinogen 7,12-dimethylbenz(a)anthracene (DMBA) once per  
343 week for 6 consecutive weeks during puberty (Figure 2A). DMBA induces DNA damage  
344 through the formation of DNA adducts and is commonly used in rodent models to study  
345 the onset and timing of mammary tumour formation [33-35]. Mice were monitored on a  
346 weekly basis for tumour formation. The timing of tumour initiation was not altered  
347 (Figure 2B) however, 95% of MMTV-*Spy1* mice developed tumours as compared to only  
348 45% of control mice (Figure 2C). Of the tumours developed, 80% of MMTV-*Spy1* mice  
349 presented with mammary tumours both benign and malignant, as compared to only 30%  
350 of littermate controls. Interestingly, ovarian tumours occurred in MMTV-*Spy1* mice, but  
351 there was no incidence of ovarian tumours in littermate controls. Tumour tissue was sent  
352 for pathological analysis, and MMTV-*Spy1* mice had significantly more malignant  
353 mammary tumours over littermate controls (Figures 2D-E).

354 *p53 can regulate protein levels of Spy1.*

355 Previous mammary fat pad transplantation of *Spy1* overexpressing HC11 cells leads to  
356 increased tumour formation *in vivo* [20]. HC11 is an immortalized cell line with mutated  
357 *p53* that renders *p53* non-functional [36-38]. *Spy1* is capable of preventing checkpoint  
358 activation [15] and since *p53* plays a critical role in mediating proper checkpoint  
359 activation, it is plausible then that the lack of spontaneous tumours in the MMTV-*Spy1*  
360 mice may be attributed to the presence of wild-type *p53*. To test this theory, primary  
361 mammary epithelial cells were extracted from an MMTV-*Spy1* mouse and *p53* was  
362 knocked down using siRNA (Figure 3A). Interestingly, with only a modest decrease in  
363 *p53* protein levels (Figure 3A; middle panel) there was a very significant increase in *Spy1*

364 protein levels (Figure 3A; left panel). Given that tumour formation was seen in a cell line  
365 with non-functional p53, and Spy1 can prevent checkpoint activation [13, 15, 16, 20], it is  
366 plausible then that wild-type p53 may work to downregulate Spy1 to allow for p53  
367 mediated cell cycle arrest, and elevated Spy1 with loss of p53 function would allow for  
368 enhanced genomic instability. To test the ability of wild-type p53 to regulate levels of  
369 Spy1 protein, mammary cells with mutated p53 (HC11 and MDA-MB-231 cells) were  
370 transfected with pEIZ, pEIZ-Spy1, p53 or pEIZ-Spy1 and p53 and lysates collected at 24  
371 hours for Western blot analysis. Levels of Spy1 protein were significantly decreased in  
372 the presence of wild-type p53 (Figure 3B). To determine if p53 also affected Spy1  
373 mRNA, MDA-MB-231 cells were transfected with pEIZ, pEIZ-Spy1, p53 or pEIZ-Spy1  
374 and p53 and levels of mRNA were assessed via qRT-PCR. There was no effect on levels  
375 of Spy1 mRNA in the presence of elevated p53 indicating that p53 likely regulates Spy1  
376 expression at the level of protein expression (Figure S4A). Previous data has  
377 demonstrated that Spy1 is targeted for proteasome-dependent degradation via either the  
378 E3 ubiquitin ligase Nedd4 [28] or the Skp2 ubiquitin ligase [39], which pathway is active  
379 may depend on phase of the cell cycle. To determine if the downregulation of Spy1 by  
380 p53 is proteasome dependent, Spy1 and p53 were expressed in the presence of the  
381 proteasome inhibitor MG132. Inhibition of the proteasome in the presence of p53  
382 abrogated the downregulation of Spy1 protein, supporting that p53 regulates protein  
383 levels of Spy1 via a proteasome dependent mechanism (Figure 3C). To determine  
384 whether Nedd4 or Skp2 were responsible for p53-mediated degradation of Spy1, Spy1  
385 and p53 were overexpressed along with dominant negative forms of both Nedd4 and  
386 Skp2. Levels of Spy1 were significantly decreased in the presence of p53 and the



387 dominant negative Skp2; however, loss of Nedd4 activity significantly reduced the ability  
388 of p53 to decrease levels of Spy1 (Figure 3D). To determine if p53 is capable of  
389 mediating levels of Nedd4, p53 was overexpressed and protein and RNA levels of Nedd4  
390 were examined. No significant differences were seen at either the levels of protein or  
391 RNA (Figure S4B,C). Previous data has also demonstrated that post-translational  
392 modification of Spy1 at residues Thr15, Ser22, Thr33 targets Spy1 for degradation by  
393 Nedd4 [28]. Wild-type Spy1 and a mutant non-degradable by Nedd4 (Spy1-TST) were  
394 both overexpressed in the presence of p53. Levels of wild-type Spy1 are significantly  
395 decreased in the presence of p53; however, p53 is unable to downregulate Spy1-TST  
396 indicating that post-translational modifications of Spy1 play an important role in p53  
397 mediated degradation of Spy1 (Figure 3E). This data supports that Spy1 levels are tightly  
398 controlled by p53 and this response is dependent on the E3 ligase Nedd4.

399 *Spy1 downregulation is a necessary component of the DDR.*

400 Spy1 can override the function of downstream effectors of p53 [13, 15], hence we  
401 hypothesize that negative regulation of Spy1 by wild-type p53 may be essential to ensure  
402 a healthy DDR response. To test this, cell proliferation was measured in HC11, MCF7  
403 and MDA-MB-231 cells following Spy1, p53 or Spy1 and p53 overexpression in the  
404 presence or absence of DNA damage stimuli (Figures 4A-B). Spy1 was capable of  
405 overriding the effects of constitutive expression of p53 both in the presence and absence  
406 of damage in both DMBA (Figure 4A) and UV damage (Figure 4B). It is notable that this  
407 effect was independent of endogenous p53 status. To further examine the functional  
408 relationship between Spy1 and p53 in primary mammary epithelial cells, p53 levels were  
409 manipulated with siRNA in cells extracted from the MMTV-Spy1 mice or littermate

410 controls (Figure 4C; left panel). Cell proliferation was measured in the presence and  
411 absence of UV damage (Figure 4C; right panel). These data demonstrate that endogenous  
412 levels of wild-type p53 keep a check on primary mammary populations in both the  
413 presence and absence of damage and that loss of p53 resulted in a robust increase in  
414 Spy1-mediated effects on proliferation.

415 *Spy1 expression disrupts the DDR in the presence of DMBA.*

416 To validate the *in vitro* findings that Spy1 elevation can alter proper checkpoint  
417 activation, MMTV-Spy1 mice were treated with 1 mg DMBA, and inguinal mammary  
418 gland tissues were collected after 48 hours and analysed for alterations in known DDR  
419 proteins (Figure 5A). Spy1 was significantly overexpressed at the mRNA level in 8-  
420 week-old MMTV-Spy1 mice with and without DMBA (Figure S5A). Spy1 protein levels  
421 were also elevated in the MMTV-Spy1 mice over littermate controls both in the presence  
422 and absence of DMBA (Figure 5B; left panel). Importantly, Spy1 protein levels increased  
423 in control mice following treatment with DMBA in accordance with previous data  
424 demonstrating Spy1 is upregulated in response to damage [15]. Interestingly, p53 levels  
425 were significantly higher in the MMTV-Spy1 mice over littermate controls after DMBA  
426 treatment (Figure 5B compare left to right panels, Figure S5B). MMTV-Spy1 mice  
427 treated with DMBA were also found to have a significant increase in Nedd4 expression at  
428 the same time as p53 suggesting an upregulation in pathways responsible for Spy1  
429 mediated degradation (Figure 5C).

430 *Elevated levels of Spy1 lead to accumulated DNA damage.*

431 The effects of Spy1 on the level of DNA damage following exposure to DMBA was  
432 investigated *in vivo*. MMTV-Spy1 mice at 8 weeks of age were again treated once with

433 DMBA and samples were collected and analyzed 48 hours post treatment. MMTV-Spy1  
434 mice had significantly more  $\gamma$ H2AX positive cells as compared to littermate controls,  
435 indicating a lack of repair in response to DMBA (Figure 5D). To determine if this is  
436 ubiquitous for different forms of DNA damage, primary inguinal mammary gland cells  
437 from MMTV-Spy1 mice and control littermates were isolated and UV irradiated with 50  
438 J/m<sup>2</sup>. Expression of  $\gamma$ H2AX was monitored at a time course following damage. Cells  
439 from MMTV-Spy1 mice had significantly more  $\gamma$ H2AX positive cells at 24 hours post  
440 UV as compared to control littermate cells (Figure 5E). Data from the MMTV-Spy1  
441 mouse both *in vivo* and *in vitro* shows a significant increase in  $\gamma$ H2AX following DNA  
442 damage, which is in opposition to previously published data, which shows a significant  
443 decrease in  $\gamma$ H2AX with Spy1 overexpression [13, 16]. To determine if this is due to a  
444 difference in the time points studied, HC11 cells were transfected with pCS3 or Myc-  
445 Spy1-pCS3, UV irradiated and studied at a wide time course. At all times collected in  
446 non-irradiated cells, Spy1 overexpression led to a significant decrease in  $\gamma$ H2AX as  
447 compared to control (Figure 5F). Following UV however,  $\gamma$ H2AX was significantly  
448 lower in Spy1 cells at early time points and then significantly higher at 48 hours post UV.  
449 Previous work has examined the role of Spy1 in checkpoint activation following damage  
450 [13, 16]. Spy1 overexpression lead to decreased activation of both S phase and G2M  
451 checkpoints, as well as decreased activation of DDR signaling as assessed through Chk1  
452 phosphorylation status [13, 16]. Spy1 also decreased rates of removal of damage  
453 following UV, indicating that elevated levels of Spy1 prevent cellular checkpoint  
454 activation and impair removal of damage [13]. This data supports that elevated levels of  
455 Spy1 may promote proliferation and a delayed or impaired recognition of DNA damage

456 at early time points, however overriding checkpoints over time leads to an accumulation  
457 of DNA damage.

458 *In the absence of p53, Spy1 drives hyperplasia.*

459 To determine if loss of p53 cooperates with Spy1 to promote tumourigenesis, levels of  
460 p53 were assessed in DMBA treated MMTV-Spy1 mice and their control littermates at  
461 end point (Figure 2A) to determine if a decrease in p53 correlated with the development  
462 of tumours in DMBA treated MMTV-Spy mice. Levels of p53 were significantly lower  
463 in both MMTV-Spy1 DMBA induced mammary tumours as well as surrounding normal  
464 mammary tissue as compared to control (Figure 6A). Interestingly, there was no  
465 difference in p53 expression in control surrounding normal mammary tissue as compared  
466 to control DMBA mammary tumours, while MMTV-Spy1 DMBA mammary tumours  
467 had significantly lower p53 as compared to MMTV-Spy1 normal mammary tissue  
468 (Figure 6A). To determine if the loss of p53 is sufficient to drive spontaneous  
469 tumourigenesis with elevated levels of Spy1, MMTV-Spy1 mice were crossed with p53  
470 null mice. Mammary fat pad transplantation was performed when mice were 8 weeks of  
471 age to transplant extracted primary mammary epithelial cells from the resulting crosses  
472 into the cleared fat pad of 3 week old wild type mice to eliminate the possibility of other  
473 tumours forming prior to the onset of mammary tumours. Mice were left to age for up to  
474 2 years and monitored for formation of spontaneous mammary tumours. Whole mount  
475 analysis was performed on glands that did not develop tumours to assess for the  
476 formation of hyperplastic alveolar nodules (HANs) (Figure 6B, C). There was a  
477 significant increase in formation of HANs and tumours in fat pads of wild-type mice  
478 reconstituted with mammary epithelial cells from intercrossed MMTV-Spy1 p53<sup>-/-</sup> mice

479 as compared to mice reconstituted with wild-type mammary epithelial cells. One MMTV-  
480 Spy1 p53<sup>+/-</sup> mouse developed a mammary tumour at 25 weeks post-transplant, while no  
481 p53<sup>+/-</sup> mice developed tumours even when left to 2 years of age. Two p53<sup>-/-</sup> and two  
482 MMTV-Spy1 p53<sup>-/-</sup> mice developed tumours and there was no difference in number of  
483 glands with HANs or tumours when comparing p53<sup>+/-</sup> to MMTV-Spy1 p53<sup>+/-</sup>. Complete  
484 loss of p53 with elevated levels of Spy1 lead to increased formation of HANs when  
485 comparing p53 loss alone with p53 loss combined with elevated Spy1 (Figure 6B).  
486 Numbers of both p53<sup>-/-</sup> and MMTV-Spy1 p53<sup>-/-</sup> were lower than expected Mendelian  
487 ratios likely due to embryonic lethality. Elevated levels of Spy1 appear to enhance  
488 hyperplastic growth of mammary gland tissue when combined with loss of p53. This data  
489 supports the conclusion that wild-type p53 holds Spy1 levels in check to permit  
490 successful checkpoint regulation and preserve genomic integrity of the gland.

## 491 **Discussion**

492 Development of the transgenic MMTV-Spy1 mouse has yielded new insight into the  
493 molecular regulation of the breast during development, revealing how misregulation of  
494 cell cycle checkpoints can impact susceptibility to tumorigenesis. On the tumor resistant  
495 B6CBAF1/J background the MMTV-Spy1 mice develop normally, showing no overt  
496 phenotypic differences and no spontaneous tumorigenesis, despite a significant increase  
497 in proliferative potential of mammary epithelial cells [40] Primary mammary epithelial  
498 cells also demonstrate increased proliferative potential. Previous data demonstrated that  
499 overexpression of Spy1 in the murine HC11 cell line shows disrupted two-dimensional  
500 acinar development *in vitro*, accelerated ductal development *in vivo*, and increased  
501 tumorigenesis when transplanted into cleared mammary fat pads [20]. One difference

502 between these systems is the HC11 cell line contains a mutated p53 which renders p53  
503 non-functional [36-38]. Investigating this hypothesis, we found that that knockdown of  
504 p53 in MMTV-Spy1 primary mammary epithelial cells increases Spy1 protein levels  
505 significantly. To examine the relationship between Spy1 and p53, we turned our attention  
506 to *in vitro* cell systems, using a variety of cell lines differing in the status of p53 and  
507 DNA repair pathways. We found an inverse relationship between Spy1 and p53 protein  
508 levels in every cell system studied, and constitutive induction of Spy1 was capable of  
509 abrogating p53 mediated effects on proliferation in all scenarios. This supports previous  
510 functional data demonstrating that Spy1 can override the DDR and bypass checkpoint  
511 responses [12, 13, 15, 16]. We also demonstrated that p53 mediated degradation of Spy1  
512 is proteasome dependent and specifically requires the E3 ligase Nedd4. Collectively,  
513 these data support that p53 targets Spy1 protein levels to ensure the normal functioning of  
514 the DDR.

515 Mice treated with DMBA had elevated p53 levels, along with a significant  
516 increase in the number of  $\gamma$ H2AX cells. The elevated p53 seen in the MMTV-Spy1 mice  
517 upon exposure to DMBA without the subsequent decrease in Spy1 levels shown in cell  
518 systems may be due to the strong viral promoter in the transgene which would allow for  
519 consistent elevation of Spy1 despite the mounting p53 response to try and decrease  
520 levels. Increased levels of  $\gamma$ H2AX can signify latent unrepaired damage, or perhaps a  
521 delay in the repair response to DNA damage. Increased expression of  $\gamma$ H2AX is  
522 indicative of increased levels of DNA damage, which in turn can lead to accumulation of  
523 deleterious mutations and onset of tumourigenesis. Alterations in the accumulation and  
524 subsequent decrease in  $\gamma$ H2AX is also shown *in vitro* indicating alterations to the DNA

525 damage response. We demonstrate that indeed the MMTV-Spy1 mice present with a  
526 significant increase in tumour formation. While there were some interesting findings with  
527 the histology of DMBA induced tumours, no significant differences were found between  
528 DMBA induced tumours in control versus MMTV-Spy1 mice. Many of the histologies  
529 noted are commonly found in DMBA induced tumours, however, further investigation is  
530 warranted to determine if Spy1 is capable of driving different subtypes or histologies of  
531 breast cancer [41, 42].

532         When crossed with p53 null mice, fat pads of wild-type mice reconstituted with  
533 mammary epithelial cells from intercrossed MMTV-Spy1 mice with loss of p53 had more  
534 hyperplasia and tumours over wild-type mice reconstituted with wild-type mammary  
535 epithelial cells. The data suggests that complete loss of p53 may enhance the ability of  
536 Spy1 to drive tumourigenesis. To test this MMTV-Spy1 primary mammary epithelial  
537 cells were manipulated for p53 levels and data supports this hypothesis, there is a  
538 significant increase in proliferation in the absence of p53. Future work to combine this  
539 with known oncogenic drivers is an important next step. Reports in the literature show the  
540 loss of p53 alone on a susceptible strain of mouse leads to formation of mammary  
541 tumours in 75% and 55% of p53 null and heterozygous mice respectively [43]. It is  
542 important to note the differences in strain between the reported literature and the MMTV-  
543 Spy1 and p53 intercross described in this study. While Balb/C mice are known to be  
544 more susceptible to mammary tumour formation, C57BL/6 mice are known to be more  
545 resistant, which may also account for lower rates of tumour onset seen with the MMTV-  
546 Spy1 and p53 null intercross [40, 44]. Our data supports that elevated protein levels of  
547 Spy1 cooperate with these events.

548           Increased susceptibility to breast cancer, such as familial cases of breast cancer,  
549 are often caused by inherited mutations in genes that regulate the DDR, such as BRCA  
550 and p53 [5, 11, 45, 46]. It is likely that other genes which mediate cell cycle progression  
551 and alter the DDR may also be involved in enhanced susceptibility. Interestingly, studies  
552 investigating genes involved in breast cancer susceptibility have identified chromosome  
553 2p, and specifically 2p23.2, as a site which may have genes that contribute to increased  
554 breast cancer risk [47-49]. This identified location maps directly to the chromosomal  
555 location of the Spy1 gene (*SPDYA*). While further work is needed to definitively identify  
556 Spy1 as a breast cancer susceptibility gene, the current data provides support for Spy1 in  
557 enhancing susceptibility.

## 558 **Conclusions**

559           Collectively, this work presents a novel feedback loop between the atypical cell  
560 cycle regulator Spy1 and the tumour suppressor protein p53, where tight control over  
561 Spy1 protein levels is required to maintain normal expansion of the developing mammary  
562 epithelium. When p53 is mutated, or Spy1 is expressed at elevated levels, this will allow  
563 for deleterious mutations to accumulate, increasing susceptibility to tumourigenesis  
564 (Figure 7). Restoring p53 function has been an elusive target in the clinic. Spy1-Cdk  
565 regulation is a unique and potentially potent mechanism for drug design, which may  
566 represent a novel therapeutic approach for select forms of breast cancer.

567

## 568 **Ethics Approval and Consent to Participate**

569 All experiments performed were approved by the University of Windsor Animal Care Committee.

## 570 **Consent for Publication**

571 All authors have agreed to publish this manuscript.



572 **Availability of data and materials**

573 All data generated from this study are included in the manuscript and additional file 1  
574 supplemental files.

575 **Funding**

576 B.F. acknowledges scholarship support from the University of Windsor, the Ontario  
577 Graduate Scholarship Program and the Canadian Breast Cancer Foundation. This work  
578 was supported by Canadian Institutes Health Research to L.A.P (Grant#142189).

579 **Conflict of Interest**

580  
581 The authors have no conflicts to disclose.

582

583 **Author Contributions**

584 BF, IQ, EK and LAP contributed to project design. BF, IQ, EK and RDC contributed to  
585 data acquisition. BF, IQ, RDC and LAP contributed to data analysis. BF, IQ and LAP  
586 prepared the manuscript. LAP secured the funding for this study.

587 **Acknowledgements**

588 We thank Drs. C. Pin, F. Dick and L. Drysdale from the London Regional Transgenic and  
589 Gene Targeting Facility for the transgenic injections and helpful advice. Drs. M.  
590 Crawford and D. Higgs for use of equipment. Special thanks to Dr. W. Muller for the  
591 MMTV-SV40-TRPS-1 vector and Dr. C. Shemanko for donation of HC11 cell line.  
592 Thanks to A. Malysa, E. Jalili, D. Lubanska, E. Laurie, M. Elliot and N. Paquette for  
593 assistance with statistics, vector construction, idea generation, genotyping and technical  
594 assistance.

595 **Author Information**

596 Bre-Anne Fifield<sup>1</sup>, Ingrid Qemo<sup>1</sup>, Evie Kirou<sup>1</sup>, Robert D. Cardiff<sup>2</sup> and Lisa Ann Porter<sup>1\*</sup>

597

598 \*Corresponding author

599

600

601 <sup>1</sup>Department of Biological Sciences

602 University of Windsor

603 Windsor, ON N9B 3P4

604

605 <sup>2</sup>Center of Comparative Medicine

606 University of California

607 Davis, CA, USA

608

609 [fifield@uwindsor.ca](mailto:fifield@uwindsor.ca)

610 [qemo@uwindsor.ca](mailto:qemo@uwindsor.ca)

611 [ekirou@gmail.com](mailto:ekirou@gmail.com)

612 [rdcardiff@ucdavis.edu](mailto:rdcardiff@ucdavis.edu)

613 [lporter@uwindsor.ca](mailto:lporter@uwindsor.ca)

614

## 615 **References**

- 616 1. Bartek J, Lukas J: **Pathways governing G1/S transition and their response to DNA**  
617 **damage.** *FEBS Lett* 2001, **490**(3):117-122.
- 618 2. Meek DW: **The p53 response to DNA damage.** *DNA Repair (Amst)* 2004, **3**(8-9):1049-  
619 1056.
- 620 3. Sakaguchi K, Herrera JE, Saito S, Miki T, Bustin M, Vassilev A, Anderson CW, Appella E:  
621 **DNA damage activates p53 through a phosphorylation-acetylation cascade.** *Genes Dev*  
622 1998, **12**(18):2831-2841.
- 623 4. Sancar A, Lindsey-Boltz LA, Unsal-Kacmaz K, Linn S: **Molecular mechanisms of**  
624 **mammalian DNA repair and the DNA damage checkpoints.** *Annu Rev Biochem* 2004,  
625 **73**:39-85.
- 626 5. Akashi M, Koeffler HP: **Li-Fraumeni syndrome and the role of the p53 tumor suppressor**  
627 **gene in cancer susceptibility.** *Clin Obstet Gynecol* 1998, **41**(1):172-199.
- 628 6. Soussi T, Ishioka C, Claustres M, Beroud C: **Locus-specific mutation databases: pitfalls**  
629 **and good practice based on the p53 experience.** *Nat Rev Cancer* 2006, **6**(1):83-90.
- 630 7. Hutchinson JN, Muller WJ: **Transgenic mouse models of human breast cancer.**  
631 *Oncogene* 2000, **19**(53):6130-6137.
- 632 8. Donehower LA, Harvey M, Slagle BL, McArthur MJ, Montgomery CA, Jr., Butel JS, Bradley  
633 A: **Mice deficient for p53 are developmentally normal but susceptible to spontaneous**  
634 **tumours.** *Nature* 1992, **356**(6366):215-221.
- 635 9. Purdie CA, Harrison DJ, Peter A, Dobbie L, White S, Howie SE, Salter DM, Bird CC, Wyllie  
636 AH, Hooper ML *et al*: **Tumour incidence, spectrum and ploidy in mice with a large**  
637 **deletion in the p53 gene.** *Oncogene* 1994, **9**(2):603-609.
- 638 10. Jacks T, Remington L, Williams BO, Schmitt EM, Halachmi S, Bronson RT, Weinberg RA:  
639 **Tumor spectrum analysis in p53-mutant mice.** *Curr Biol* 1994, **4**(1):1-7.
- 640 11. Stratton MR, Rahman N: **The emerging landscape of breast cancer susceptibility.** *Nat*  
641 *Genet* 2008, **40**(1):17-22.
- 642 12. Lenormand JL, Dellinger RW, Knudsen KE, Subramani S, Donoghue DJ: **Speedy: a novel**  
643 **cell cycle regulator of the G2/M transition.** *Embo J* 1999, **18**(7):1869-1877.

- 644 13. McAndrew CW, Gastwirt RF, Donoghue DJ: **The atypical CDK activator Spy1 regulates**  
645 **the intrinsic DNA damage response and is dependent upon p53 to inhibit apoptosis.**  
646 *Cell Cycle* 2009, **8**(1):66-75.
- 647 14. Porter LA, Dellinger RW, Tynan JA, Barnes EA, Kong M, Lenormand JL, Donoghue DJ:  
648 **Human Speedy: a novel cell cycle regulator that enhances proliferation through**  
649 **activation of Cdk2.** *J Cell Biol* 2002, **157**(3):357-366.
- 650 15. Barnes EA, Porter LA, Lenormand JL, Dellinger RW, Donoghue DJ: **Human Spy1**  
651 **promotes survival of mammalian cells following DNA damage.** *Cancer Res* 2003,  
652 **63**(13):3701-3707.
- 653 16. Gastwirt RF, Slavin DA, McAndrew CW, Donoghue DJ: **Spy1 expression prevents normal**  
654 **cellular responses to DNA damage: inhibition of apoptosis and checkpoint activation.** *J*  
655 *Biol Chem* 2006, **281**(46):35425-35435.
- 656 17. Cheng A, Gerry S, Kaldis P, Solomon MJ: **Biochemical characterization of Cdk2-**  
657 **Speedy/Ringo A2.** *BMC Biochem* 2005, **6**:19.
- 658 18. Karaiskou A, Perez LH, Ferby I, Ozon R, Jesus C, Nebreda AR: **Differential regulation of**  
659 **Cdc2 and Cdk2 by RINGO and cyclins.** *J Biol Chem* 2001, **276**(38):36028-36034.
- 660 19. McGrath DA, Fifield BA, Marceau AH, Tripathi S, Porter LA, Rubin SM: **Structural basis of**  
661 **divergent cyclin-dependent kinase activation by Spy1/RINGO proteins.** *Embo J* 2017,  
662 **36**(15):2251-2262.
- 663 20. Golipour A, Myers D, Seagroves T, Murphy D, Evan GI, Donoghue DJ, Moorehead RA,  
664 Porter LA: **The Spy1/RINGO family represents a novel mechanism regulating mammary**  
665 **growth and tumorigenesis.** *Cancer Res* 2008, **68**(10):3591-3600.
- 666 21. Zucchi I, Mento E, Kuznetsov VA, Scotti M, Valsecchi V, Simionati B, Vicinanza E, Valle G,  
667 Pilotti S, Reinbold R *et al*: **Gene expression profiles of epithelial cells microscopically**  
668 **isolated from a breast-invasive ductal carcinoma and a nodal metastasis.** *Proc Natl*  
669 *Acad Sci U S A* 2004, **101**(52):18147-18152.
- 670 22. Al Sorkhy M, Ferraiuolo RM, Jalili E, Malysa A, Fratiloiu AR, Sloane BF, Porter LA: **The**  
671 **cyclin-like protein Spy1/RINGO promotes mammary transformation and is elevated in**  
672 **human breast cancer.** *BMC Cancer* 2012, **12**:45.
- 673 23. Ke Q, Ji J, Cheng C, Zhang Y, Lu M, Wang Y, Zhang L, Li P, Cui X, Chen L *et al*: **Expression**  
674 **and prognostic role of Spy1 as a novel cell cycle protein in hepatocellular carcinoma.**  
675 *Exp Mol Pathol* 2009, **87**(3):167-172.
- 676 24. Lubanska D, Market-Velker BA, deCarvalho AC, Mikkelsen T, Fidalgo da Silva E, Porter  
677 LA: **The cyclin-like protein Spy1 regulates growth and division characteristics of the**  
678 **CD133+ population in human glioma.** *Cancer Cell* 2014, **25**(1):64-76.
- 679 25. Hang Q, Fei M, Hou S, Ni Q, Lu C, Zhang G, Gong P, Guan C, Huang X, He S: **Expression of**  
680 **Spy1 protein in human non-Hodgkin's lymphomas is correlated with phosphorylation**  
681 **of p27 Kip1 on Thr187 and cell proliferation.** *Med Oncol* 2012, **29**(5):3504-3514.
- 682 26. Porter LA, Kong-Beltran M, Donoghue DJ: **Spy1 interacts with p27Kip1 to allow G1/S**  
683 **progression.** *Mol Biol Cell* 2003, **14**(9):3664-3674.
- 684 27. Mroue R, Bissell MJ: **Three-dimensional cultures of mouse mammary epithelial cells.**  
685 *Methods Mol Biol* 2013, **945**:221-250.
- 686 28. Al Sorkhy M, Craig R, Market B, Ard R, Porter LA: **The cyclin-dependent kinase activator,**  
687 **Spy1A, is targeted for degradation by the ubiquitin ligase NEDD4.** *J Biol Chem* 2009,  
688 **284**(5):2617-2627.
- 689 29. Boyd SD, Tsai KY, Jacks T: **An intact HDM2 RING-finger domain is required for nuclear**  
690 **exclusion of p53.** *Nat Cell Biol* 2000, **2**(9):563-568.

- 691 30. Shin HJ, Kim H, Oh S, Lee JG, Kee M, Ko HJ, Kweon MN, Won KJ, Baek SH: **AMPK-SKP2-**  
692 **CARM1 signalling cascade in transcriptional regulation of autophagy.** *Nature* 2016,  
693 **534(7608):553-557.**
- 694 31. Vargo-Gogola T, Heckman BM, Gunther EJ, Chodosh LA, Rosen JM: **P190-B Rho GTPase-**  
695 **activating protein overexpression disrupts ductal morphogenesis and induces**  
696 **hyperplastic lesions in the developing mammary gland.** *Mol Endocrinol* 2006,  
697 **20(6):1391-1405.**
- 698 32. Sleeman KE, Kendrick H, Ashworth A, Isacke CM, Smalley MJ: **CD24 staining of mouse**  
699 **mammary gland cells defines luminal epithelial, myoepithelial/basal and non-**  
700 **epithelial cells.** *Breast Cancer Res* 2006, **8(1):R7.**
- 701 33. Lee HJ, Lee YJ, Kang CM, Bae S, Jeoung D, Jang JJ, Lee SS, Cho CK, Lee YS: **Differential**  
702 **gene signatures in rat mammary tumors induced by DMBA and those induced by**  
703 **fractionated gamma radiation.** *Radiat Res* 2008, **170(5):579-590.**
- 704 34. Hoshino A, Yee CJ, Campbell M, Woltjer RL, Townsend RL, van der Meer R, Shyr Y, Holt  
705 JT, Moses HL, Jensen RA: **Effects of BRCA1 transgene expression on murine mammary**  
706 **gland development and mutagen-induced mammary neoplasia.** *Int J Biol Sci* 2007,  
707 **3(5):281-291.**
- 708 35. Das SK, Delp CR, Bandyopadhyay AM, Mathiesen M, Baird WM, Banerjee MR: **Fate of**  
709 **7,12-dimethylbenz(a)anthracene in the mouse mammary gland during initiation and**  
710 **promotion stages of carcinogenesis in vitro.** *Cancer Res* 1989, **49(4):920-924.**
- 711 36. Merlo GR, Venesio T, Taverna D, Callahan R, Hynes NE: **Growth suppression of normal**  
712 **mammary epithelial cells by wild-type p53.** *Ann N Y Acad Sci* 1993, **698:108-113.**
- 713 37. Ogretmen B, Safa AR: **Expression of the mutated p53 tumor suppressor protein and its**  
714 **molecular and biochemical characterization in multidrug resistant MCF-7/Adr human**  
715 **breast cancer cells.** *Oncogene* 1997, **14(4):499-506.**
- 716 38. Kato S, Han SY, Liu W, Otsuka K, Shibata H, Kanamaru R, Ishioka C: **Understanding the**  
717 **function-structure and function-mutation relationships of p53 tumor suppressor**  
718 **protein by high-resolution missense mutation analysis.** *Proc Natl Acad Sci U S A* 2003,  
719 **100(14):8424-8429.**
- 720 39. Dinarina A, Santamaria PG, Nebreda AR: **Cell cycle regulation of the mammalian CDK**  
721 **activator RINGO/Speedy A.** *FEBS Lett* 2009, **583(17):2772-2778.**
- 722 40. Ullrich RL, Bowles ND, Satterfield LC, Davis CM: **Strain-dependent susceptibility to**  
723 **radiation-induced mammary cancer is a result of differences in epithelial cell**  
724 **sensitivity to transformation.** *Radiat Res* 1996, **146(3):353-355.**
- 725 41. Currier N, Solomon SE, Demicco EG, Chang DL, Farago M, Ying H, Dominguez I,  
726 Sonenshein GE, Cardiff RD, Xiao ZX *et al*: **Oncogenic signaling pathways activated in**  
727 **DMBA-induced mouse mammary tumors.** *Toxicol Pathol* 2005, **33(6):726-737.**
- 728 42. Rehm S: **Chemically induced mammary gland adenomyoepitheliomas and**  
729 **myoepithelial carcinomas of mice. Immunohistochemical and ultrastructural features.**  
730 *Am J Pathol* 1990, **136(3):575-584.**
- 731 43. Kuperwasser C, Hurlbut GD, Kittrell FS, Dickinson ES, Laucirica R, Medina D, Naber SP,  
732 Jerry DJ: **Development of spontaneous mammary tumors in BALB/c p53 heterozygous**  
733 **mice. A model for Li-Fraumeni syndrome.** *Am J Pathol* 2000, **157(6):2151-2159.**
- 734 44. Ponnaiya B, Cornforth MN, Ullrich RL: **Radiation-induced chromosomal instability in**  
735 **BALB/c and C57BL/6 mice: the difference is as clear as black and white.** *Radiat Res*  
736 1997, **147(2):121-125.**

- 737 45. Miki Y, Swensen J, Shattuck-Eidens D, Futreal PA, Harshman K, Tavtigian S, Liu Q,  
738 Cochran C, Bennett LM, Ding W *et al*: **A strong candidate for the breast and ovarian**  
739 **cancer susceptibility gene BRCA1**. *Science* 1994, **266**(5182):66-71.
- 740 46. Wooster R, Bignell G, Lancaster J, Swift S, Seal S, Mangion J, Collins N, Gregory S, Gumbs  
741 C, Micklem G: **Identification of the breast cancer susceptibility gene BRCA2**. *Nature*  
742 1995, **378**(6559):789-792.
- 743 47. Couch FJ, Kuchenbaecker KB, Michailidou K, Mendoza-Fandino GA, Nord S, Lilyquist J,  
744 Olswold C, Hallberg E, Agata S, Ahsan H *et al*: **Identification of four novel susceptibility**  
745 **loci for oestrogen receptor negative breast cancer**. *Nat Commun* 2016, **7**:11375.
- 746 48. Arason A, Gunnarsson H, Johannessdottir G, Jonasson K, Bendahl PO, Gillanders EM,  
747 Agnarsson BA, Jonsson G, Pylkas K, Mustonen A *et al*: **Genome-wide search for breast**  
748 **cancer linkage in large Icelandic non-BRCA1/2 families**. *Breast Cancer Res* 2010,  
749 **12**(4):R50.
- 750 49. Smith P, McGuffog L, Easton DF, Mann GJ, Pupo GM, Newman B, Chenevix-Trench G,  
751 Szabo C, Southey M, Renard H *et al*: **A genome wide linkage search for breast cancer**  
752 **susceptibility genes**. *Genes Chromosomes Cancer* 2006, **45**(7):646-655.

753

#### 754 **Supplemental Files**

755 Additional file 1: Figure S1.

756 Additional file 2: Figure S2.

757 Additional file 3: Figure S3.

758 Additional file 4: Figure S4.

759 Additional file 5: Figure S5.

760 Additional file 6: Supplemental Figure Legends

761

#### 762 **Figure Legends**

763 **Figure 1:** Characterization of MMTV-Spy1 mice. A) Schematic representation of the  
764 MMTV-Spy1 transgenic vector used in pronuclear injections for the generation of the  
765 MMTV-Spy1 mouse. B) Spy1 expression in 8-week-old MMTV-Spy1 and control  
766 littermate (Cntl) inguinal mammary glands, where blue stain is haematoxylin and brown  
767 stain represents Spy1 expression. Representative images in left panels with quantification

768 of Spy1 levels using ImageJ software analysis shown in right panel. Scale bar= 100  $\mu$ m.  
769 C) Representative H&E stain of inguinal mammary glands from 6-week-old MMTV-  
770 Spy1 mice and control littermates (Cntl). Scale bar = 50  $\mu$ m. D) PCNA expression in  
771 MMTV-Spy1 and littermate controls via immunohistochemical analysis. Quantification  
772 of percentage of PCNA positive mammary epithelial cells over 5 fields of view per  
773 sample (8 week Cntl n=3, MMTV-Spy1 n=4; 12 week Cntl n=3, MMT-Spy1 n=3; 16.5  
774 day pregnant Cntl n=1, MMTV-Spy1 n=2; 4 day lactation Cntl n=3, MMTV-Spy1 n=2; 4  
775 day involution Cntl n=2, MMTV-Spy1 n=2). E) Cleaved caspase 3 (CC3) expression in  
776 MMTV-Spy1 and littermate controls via immunohistochemical analysis. Quantification  
777 of percentage of CC3 positive mammary epithelial cells over 5 fields of view per sample  
778 (8 week Cntl n=3, MMTV-Spy1 n=4; 12 week Cntl n=3, MMT-Spy1 n=3; 16.5 day  
779 pregnant Cntl n=1, MMTV-Spy1 n=2; 4 day lactation Cntl n=3, MMTV-Spy1 n=2; 4 day  
780 involution Cntl n=2, MMTV-Spy1 n=2). F) Summary of proliferation and apoptosis data  
781 for developmental time course. Error bars reflect standard error (SE), Student's T-test  
782 \* $p < 0.05$ , \*\* $p < 0.01$ , \*\*\* $p < 0.001$ . See also Figures S1 and S2.

783

784 **Figure 2:** Spy1 overexpression leads to increased mammary tumour susceptibility. A)  
785 Schematic of DMBA treatment. B) Graphical representation of timing of tumour onset  
786 (n=20). C) Graphical representation of percentage of mice with tumours (n=20). D)  
787 Representative images of tumour pathology from DMBA induced mammary tumours i)  
788 and ii) adenosquamous carcinoma, iii) adenomyoepithelioma. Scale bar= 300  $\mu$ m. E)  
789 Graphical representation of the number of mice with malignant mammary tumours  
790 (n=20). Mann-Whitney\* $p < 0.05$ , \*\* $p < 0.001$

791

792 **Figure 3:** p53 regulates Spy1 protein levels through the ubiquitin ligase Nedd4. A) Western blot analysis of Spy1 (left panel) and p53 (middle panel) protein levels in MMTV-Spy1 primary mammary epithelial cells corrected for Actin. Data is represented as a fold change as compared to control siRNA (siCntl). Representative blot is shown in right panel. B) Levels of Spy1 protein were assessed via Western blot analysis 24 hours after transfection in HC11 (n=6) and MDA-MB 231 (n=5) cells transfected with pEIZ, pEIZ-Spy1, p53 or both pEIZ-Spy1 and p53. Left panels depict representative blots and right panels depict densitometry analysis of Spy1 levels corrected for Actin. C) Levels of Spy1 protein were assessed via Western blot analysis in presence and absence of MG132. Left panel depicts representative blot and right panel depicts densitometry analysis of Spy1 protein levels corrected for Actin. Data is shown as fold change to cells transfected only with the Spy1 vector (n=3). D) Levels of Spy1 protein were assessed in HEK-293 cells after transfections with control vector pCS3 and Myc-Spy1-pCS3, p53, Skp2 $\Delta$ F, and Nedd4DN in various combinations. Cells were collected 24 hours after transfection and subjected to Western blot analysis. Densitometry analysis was performed for total Spy1 protein levels and corrected for total Actin levels (n=3). E) Levels of Spy1 and Spy1-TST protein were assessed in HEK-293 cells after transfection with control vector pCS3, myc-Spy1-pCS3, myc-Spy1-TST-pCS3 and p53. Cells were collected 24 hours after transfection and subjected to Western blot analysis. Densitometry analysis was performed for total Spy1 protein levels and corrected for total Actin levels (n=3). Errors bars represent SE; Student's T-test. \*p<0.05, \*\*p<0.01, \*\*\*p<0.001, not significant (N.S.). See also Figure S3.

814

815 **Figure 4:** Spy1 can enhance proliferation in the presence of p53. A) HC11 cells were  
816 transfected with vector control, pEIZ-Spy1, p53 or pEIZ-Spy1 and p53 in the presence or  
817 absence of 1.5 $\mu$ g/mL of DMBA. Levels of Spy1 are depicted (upper panels). Growth of  
818 cells following transfection was assessed via trypan blue analysis (lower panels) (n=3).  
819 B) MCF7 (left panel) and MDA-MB 231(right panel) were transfected with vector  
820 control, pEIZ-Spy1, p53 or pEIZ-Spy1 and p53 in the presence or absence of 50J/m<sup>2</sup> UV  
821 damage. Growth of cells following transfection was assessed via trypan blue analysis  
822 (n=3). C) qRT-PCR analysis of p53 levels in littermate control (F1 Cntl) and MMTV-  
823 Spy1 primary mammary epithelial cells corrected for total GAPDH. (left panel).  
824 Quantification of BrdU positive cells with and without UV irradiation with (siCntl) and  
825 without p53 (sip53) (right panel). F1 Cntl n=5, MMTV-Spy1 n=5. Error bars represent  
826 SE; Student's T-test. \*p<0.05, \*\*p<0.01, \*\*\*p<0.001.

827

828 **Figure 5:** MMTV-Spy1 mice show alterations in DDR pathway when exposed to  
829 DMBA. A) Schematic of short term DMBA treatment and collection of samples. B)  
830 Western blot for Spy1 (left panel) and p53 (right panel) levels in 8-week-old control mice  
831 and DMBA treated mice 48 hours following DMBA exposure. Densitometry analysis is  
832 depicted with total Spy1 and p53 levels corrected for total levels of Actin. C)  
833 Immunohistochemical analysis for Nedd4 expression in inguinal mammary glands of 8-  
834 week-old MMTV-Spy1 mice and littermate controls was performed after exposure to  
835 DMBA. Representative images are shown in left panel. Levels of Nedd4 were quantified  
836 using ImageJ analysis (right panel). Scale bar=100  $\mu$ m D) Representative images of



837 immunohistochemical analysis of  $\gamma$ H2AX in inguinal mammary glands of 8-week-old  
838 MMTV-Spy1 and littermate control (Cntl) mice after exposure to DMBA (left panel),  
839 where brown stain is  $\gamma$ H2AX and blue stain is haematoxylin. Number of  $\gamma$ H2AX positive  
840 cells were counted and quantified as percentage of  $\gamma$ H2AX cells (right panel). Scale bars=  
841 100  $\mu$ m and 50  $\mu$ m (inset image) E) Primary mammary epithelial cells from MMTV-  
842 Spy1 mice and control littermates were isolated and UV irradiated with 50J/m<sup>2</sup>. Cells  
843 were collected 0, 1, 3 6 and 24 hours post-UV and immunofluorescence was performed to  
844 assess formation of  $\gamma$ H2AX foci following damage (n=3). F) HC11 cells were transfected  
845 with pCS3 and Myc-Spy1-pCS3, and UV irradiated with 50J/m<sup>2</sup>. Cells were analysed at  
846 various times following UV irradiation for the number of  $\gamma$ H2AX positive cells via  
847 immunofluorescence. Errors bars represent SE; Student's T-test. \*p<0.05, \*\*p<0.01,  
848 \*\*\*p<0.001.

849

850 **Figure 6:** Loss of p53 enhances hyperplasia in MMTV-Spy1 mice. A)  
851 Immunohistochemical analysis for p53 expression in inguinal mammary glands and  
852 tumours of DMBA treated MMTV-Spy1 mice and littermate controls. Representative  
853 images are shown in left panel. Levels of p53 were quantified using ImageJ analysis  
854 (right panel). Scale bar=100  $\mu$ m B) Fat pads of wild-type mice were reconstituted with  
855 mammary epithelial cells from MMTV-Spy1 mice crossed with p53 null mice and were  
856 monitored for HANs and formation of tumours. Only tumour negative mice were screen  
857 for the formation of HANs. (Wild-type n=5; MMTV-Spy1 n=7, p53+/- n=13; p53-/- n=6;  
858 MMTV-Spy1 p53+/- n=12; MMTV-Spy1 p53-/- n=5) C) Representative images of whole

859 mounts. Scale bar=0.1mm. Errors bars represent SE; Student's T-test (A), Mann-Whitney  
860 (B). \* $p < 0.05$ , \*\* $p < 0.01$ , \*\*\* $p < 0.001$ .

861

862 **Figure 7.** Mechanism for increased susceptibility by elevation of Spy1. Left panel  
863 reflects that Spy1 protein levels are held in check by wild-type p53 to allow tightly  
864 regulated bursts of needed mammary proliferation during development. The panel to the  
865 right reflects the situation when either p53 is mutated/deleted or Spy1 protein levels are  
866 elevated, supporting susceptibility to tumorigenesis.

867

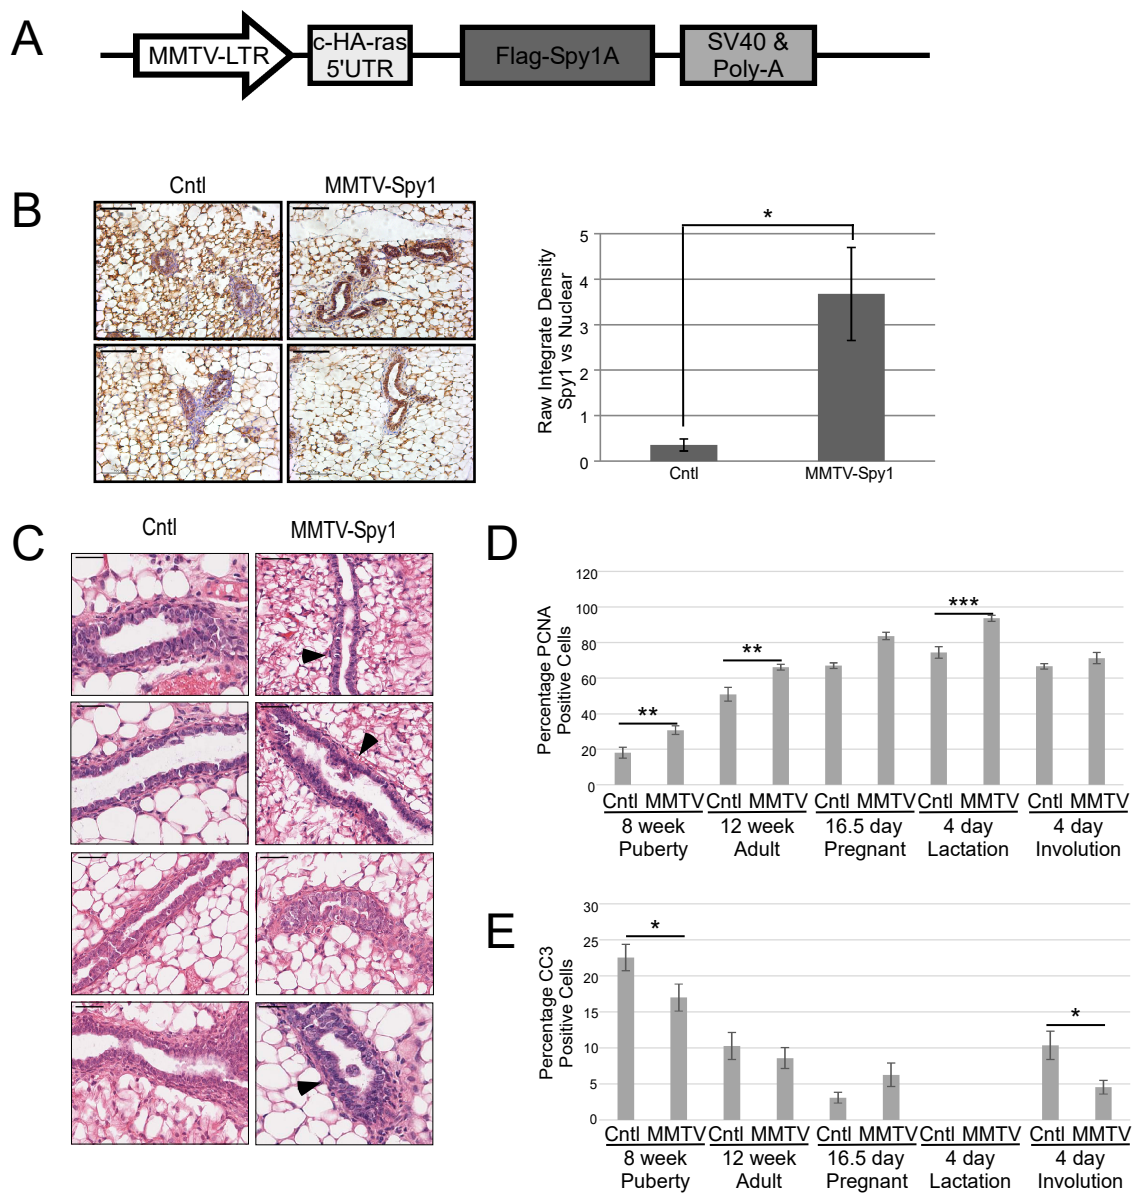

Figure 2

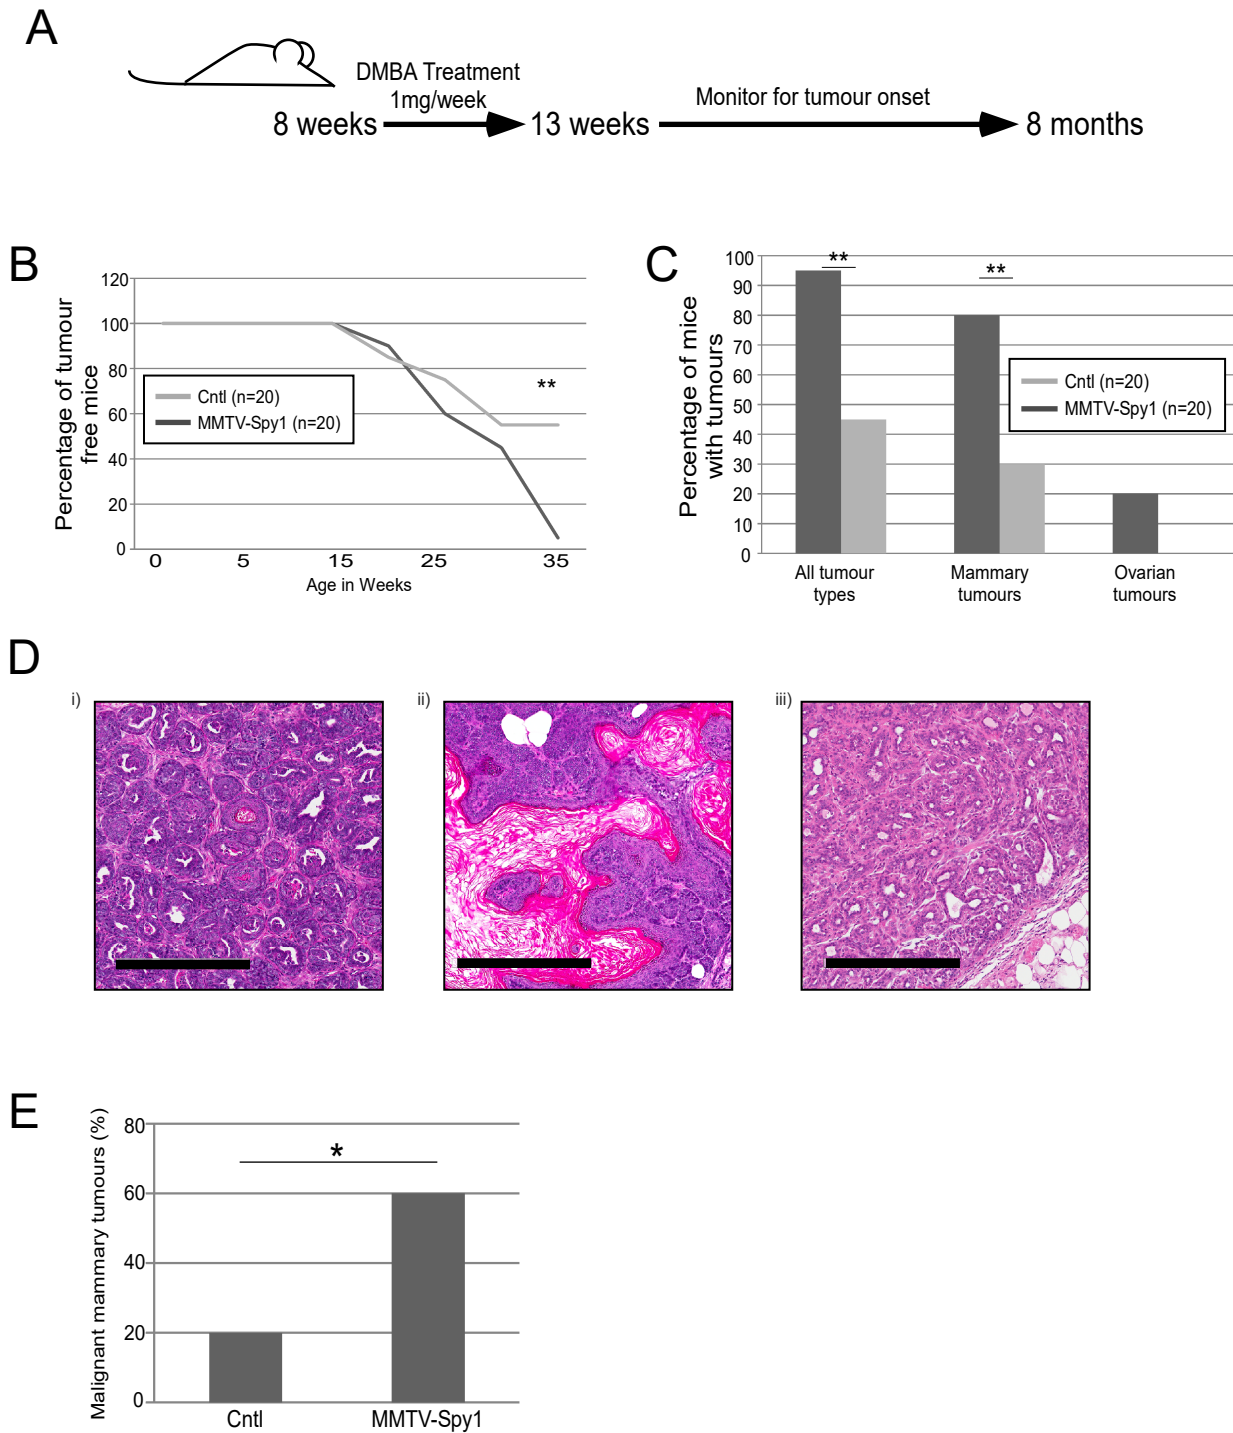

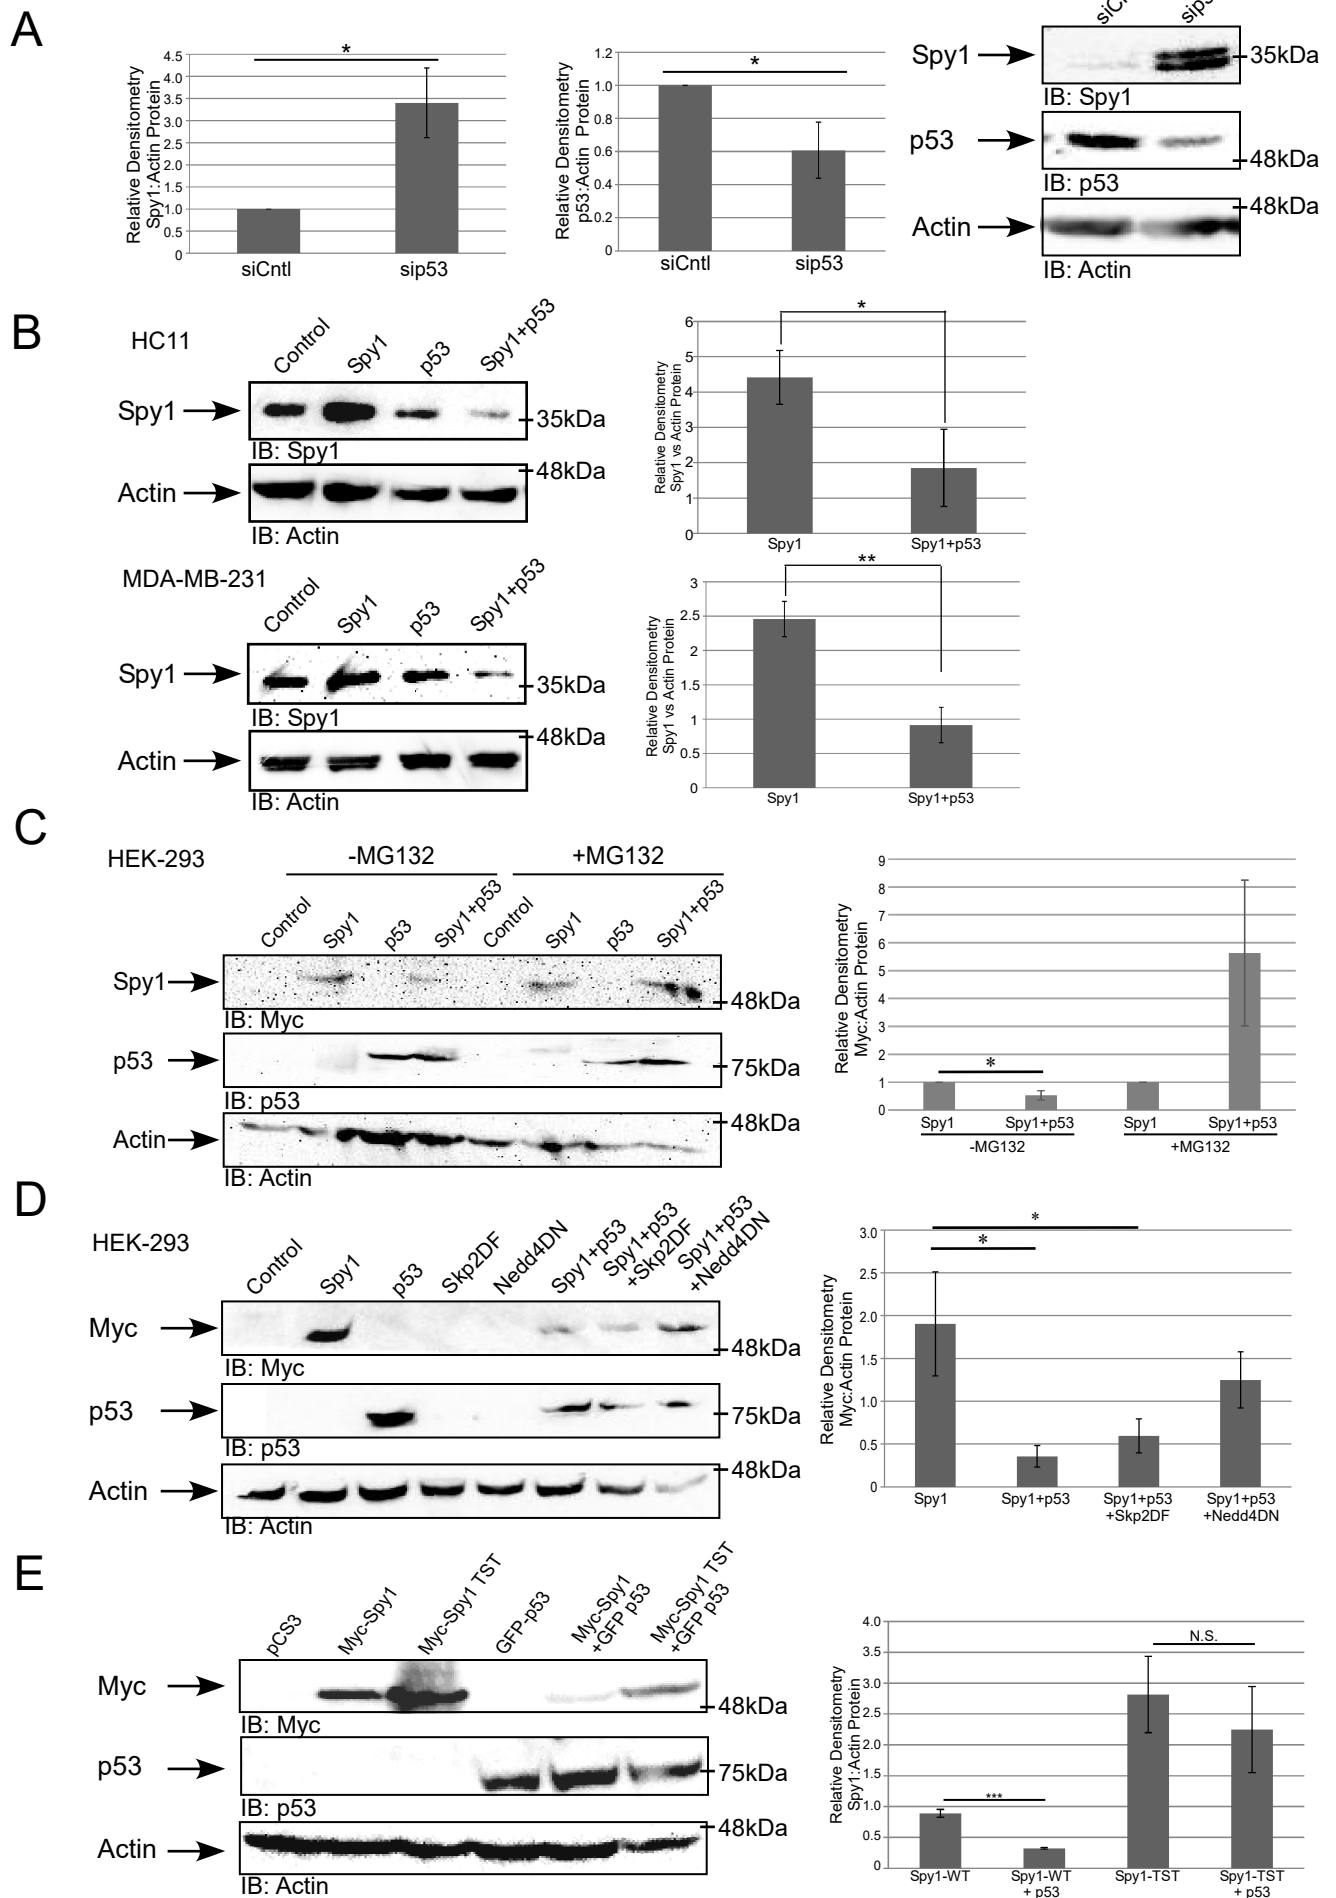

Figure 4

A

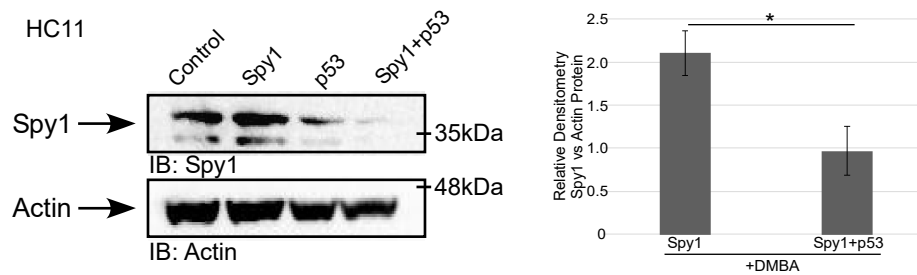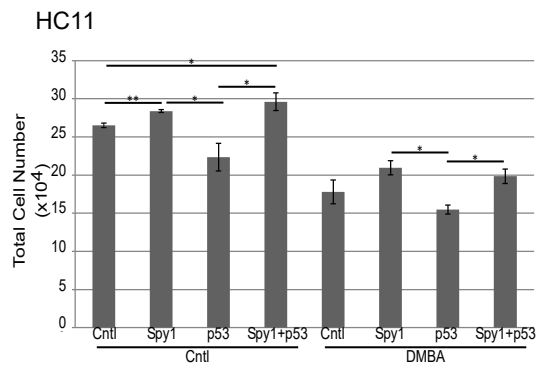

B

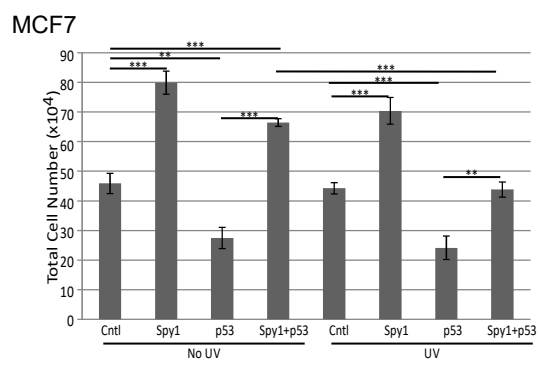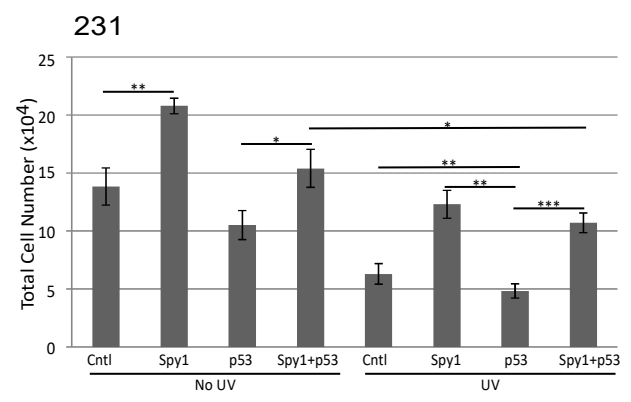

C

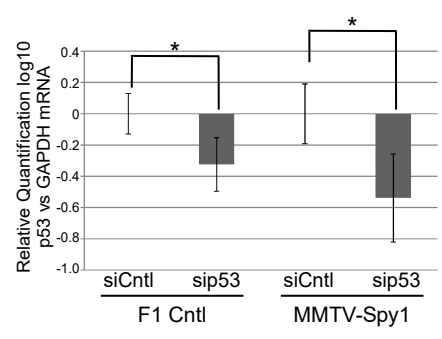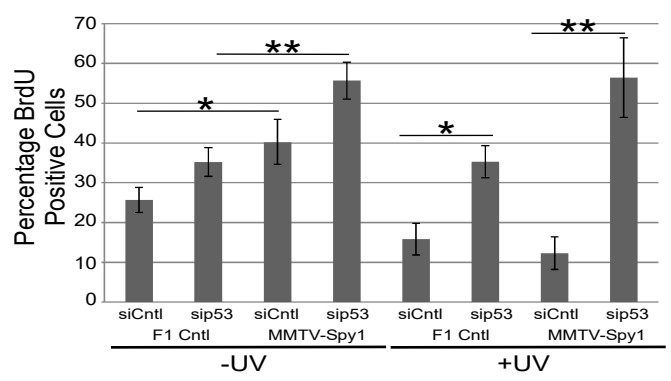

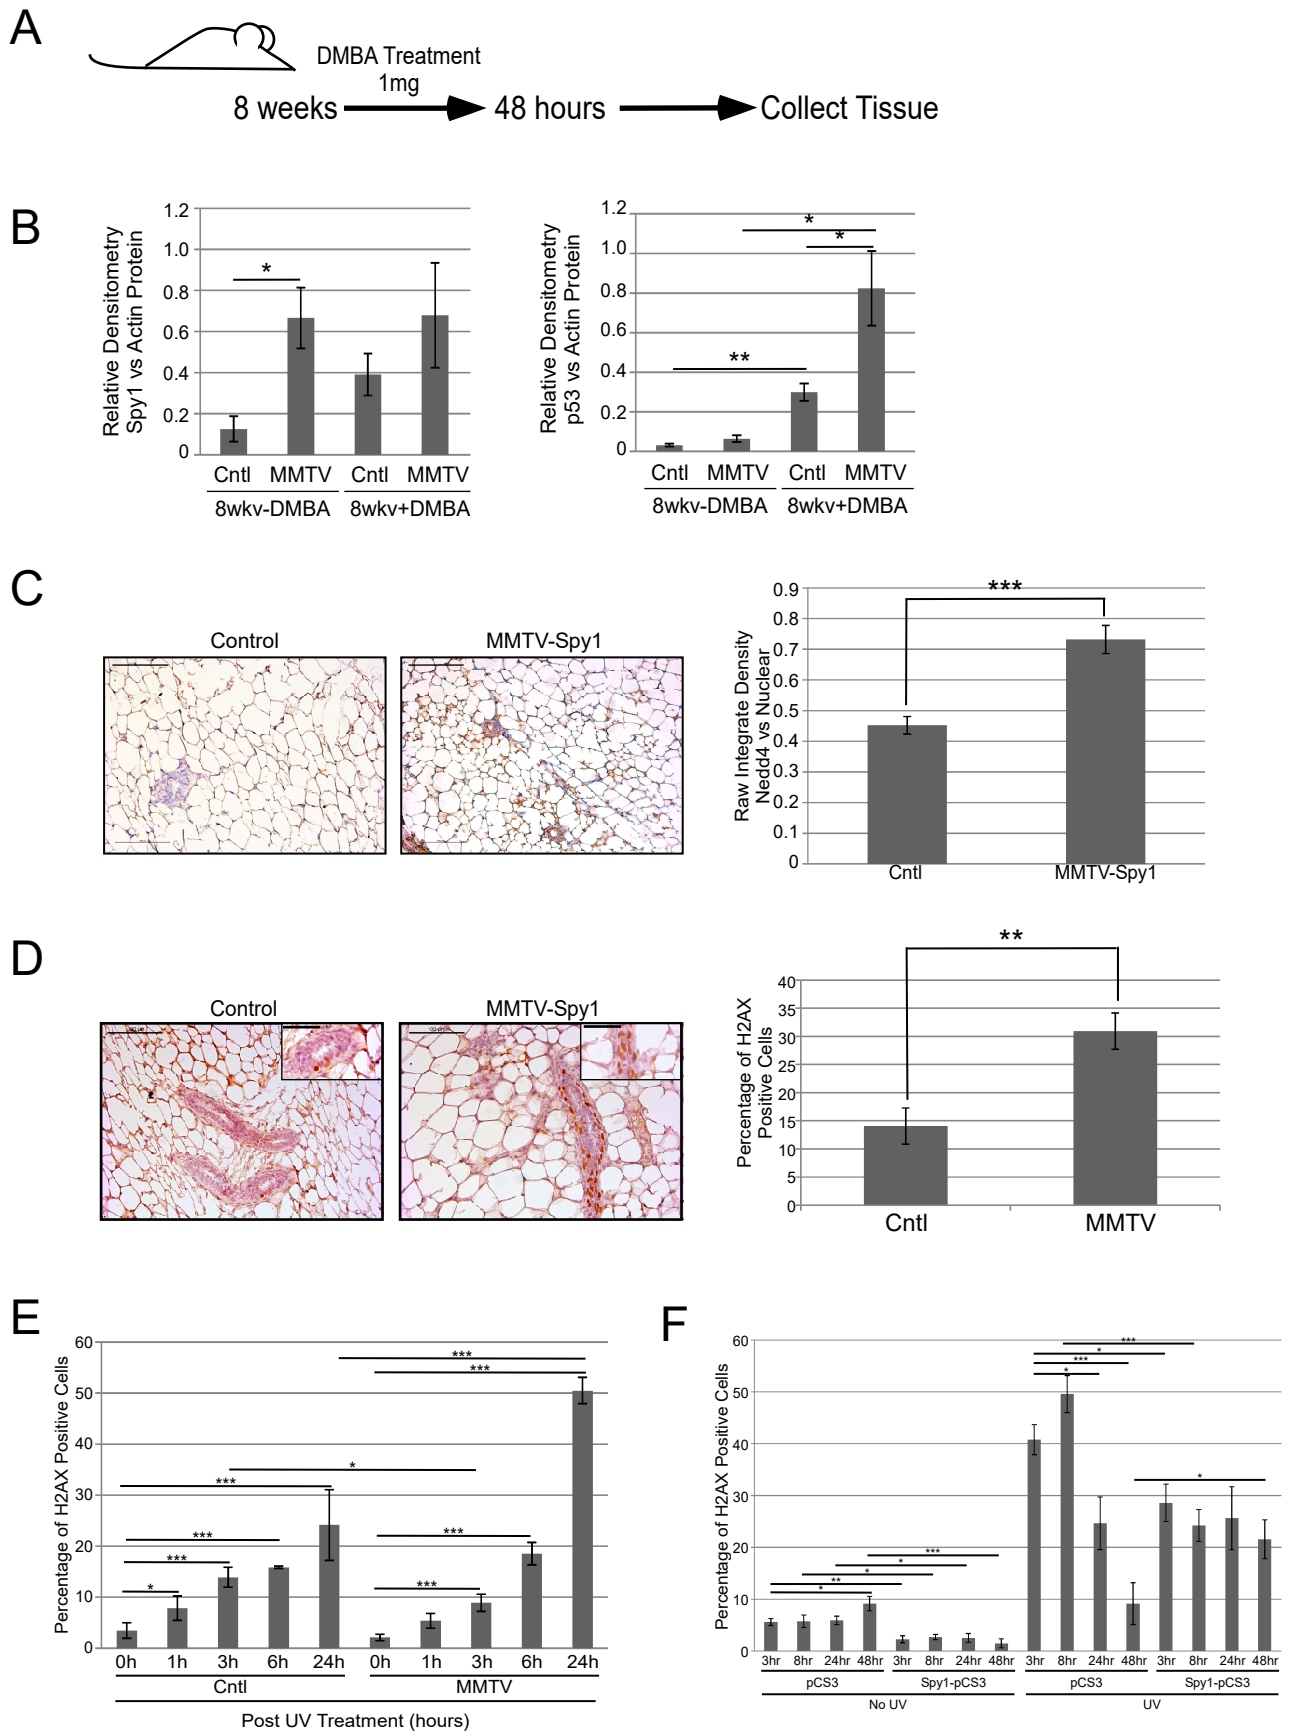

Figure 6

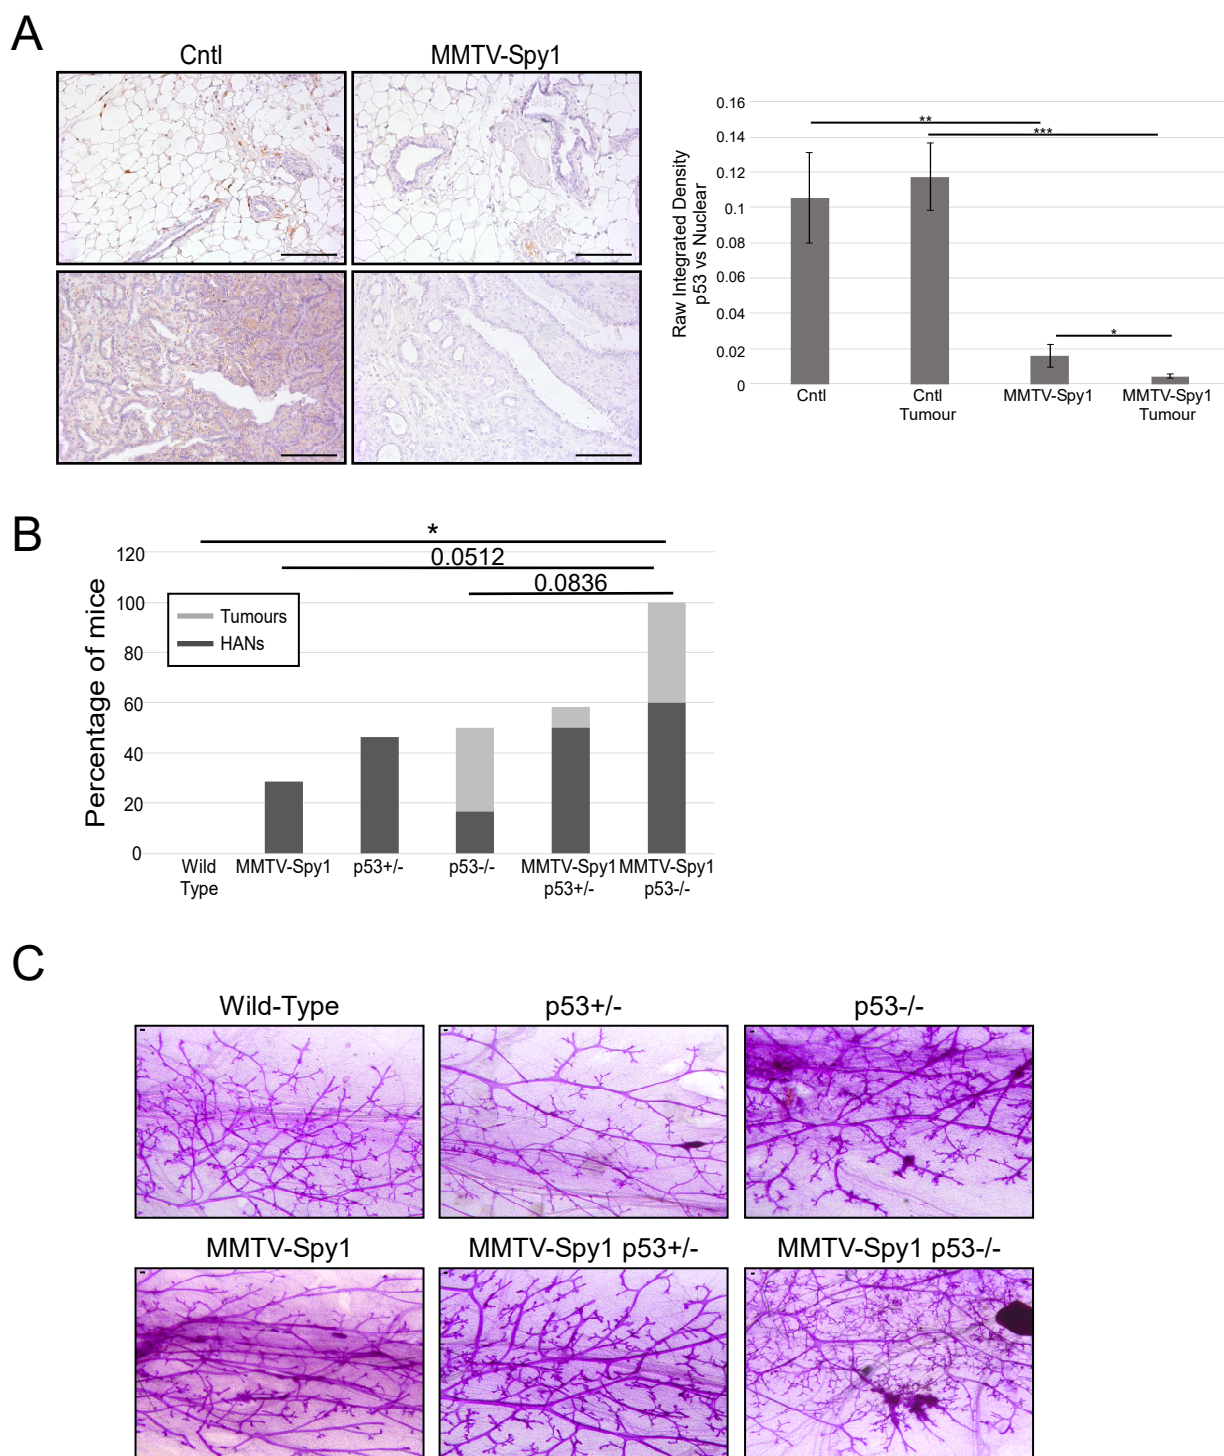



Figure 7

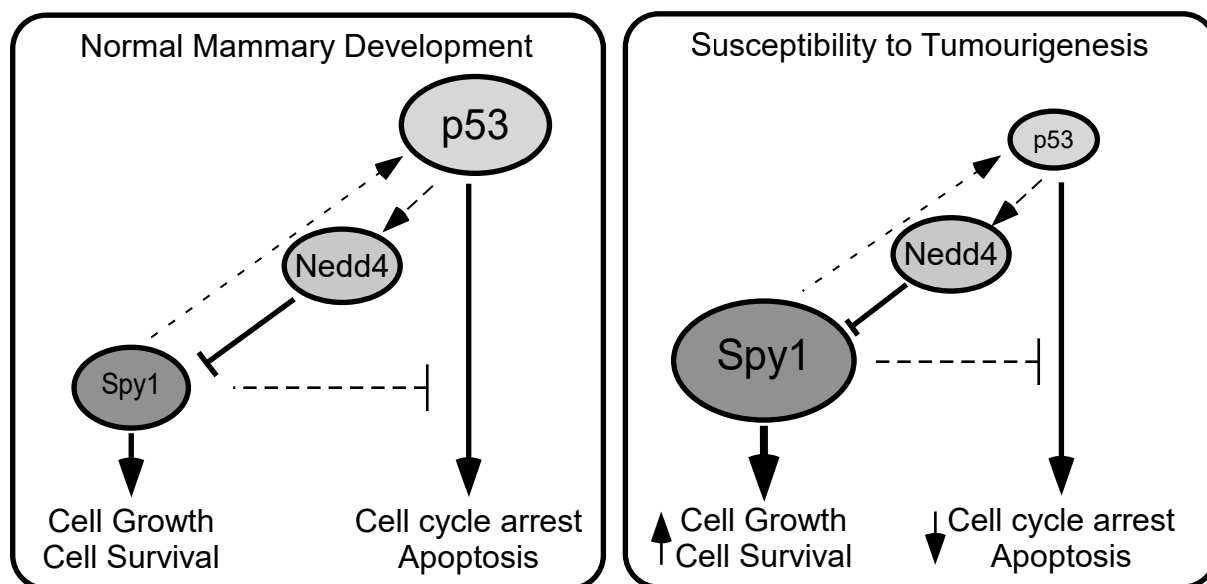

Source: https://www.biorxiv.org/content/10.1101/535310v2.full.pdf
