# Supplementary material for: The Atypical Cyclin-Like Protein Spy1 Overrides p53-Mediated Tumour Suppression and Promotes Susceptibility to Breast Tumorigenesis
Source: bioRxiv or medRxiv preprint supplement (doi:10.1101/535310), 2019-07-18

Figure S1

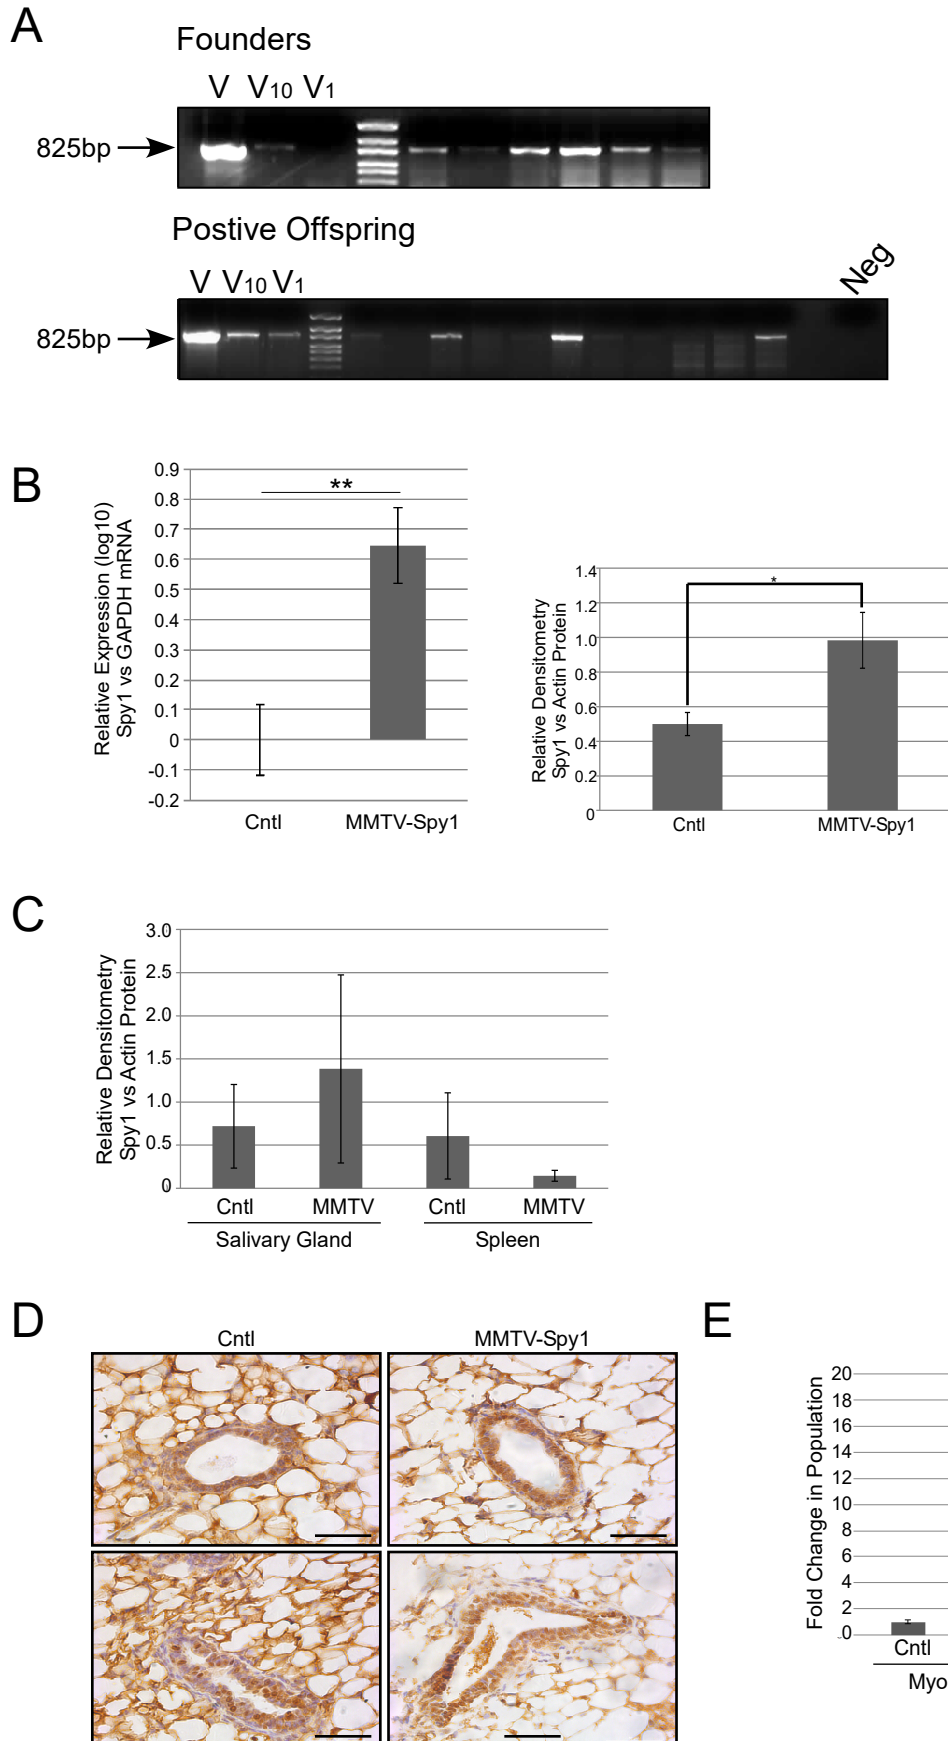

Figure S2

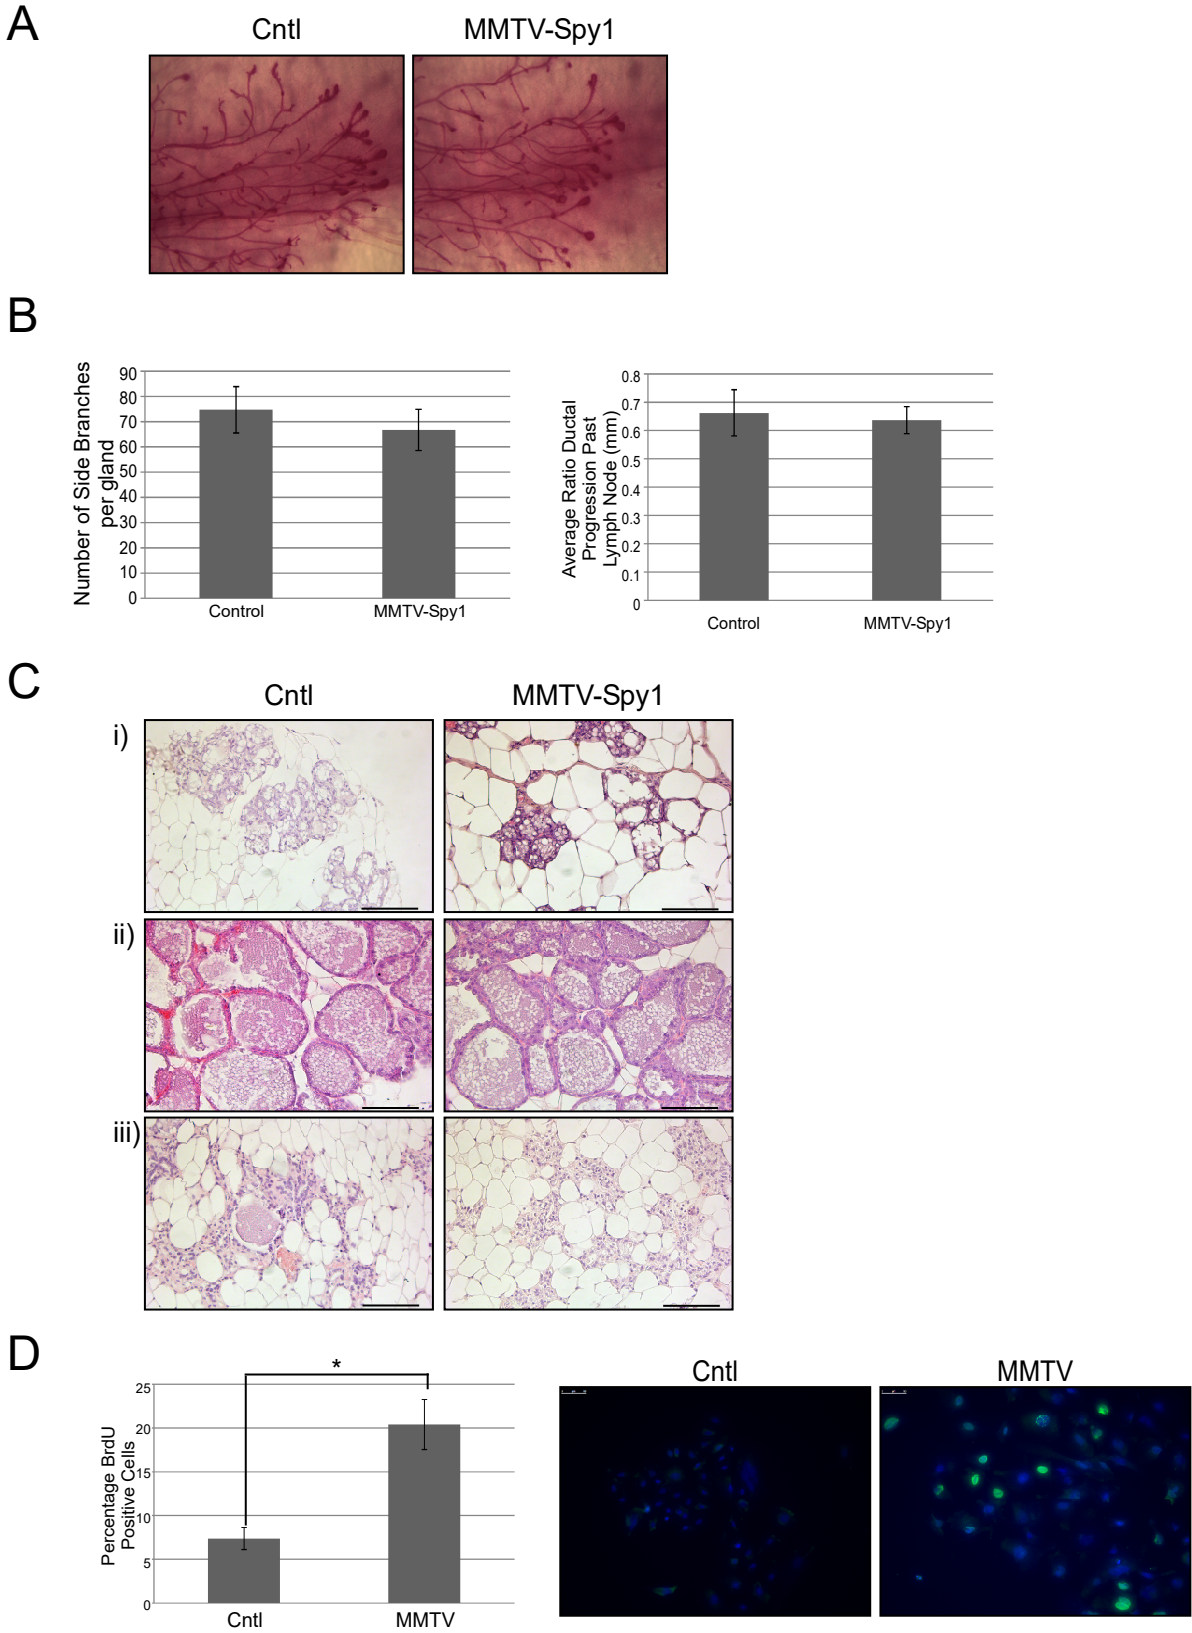



Figure S3

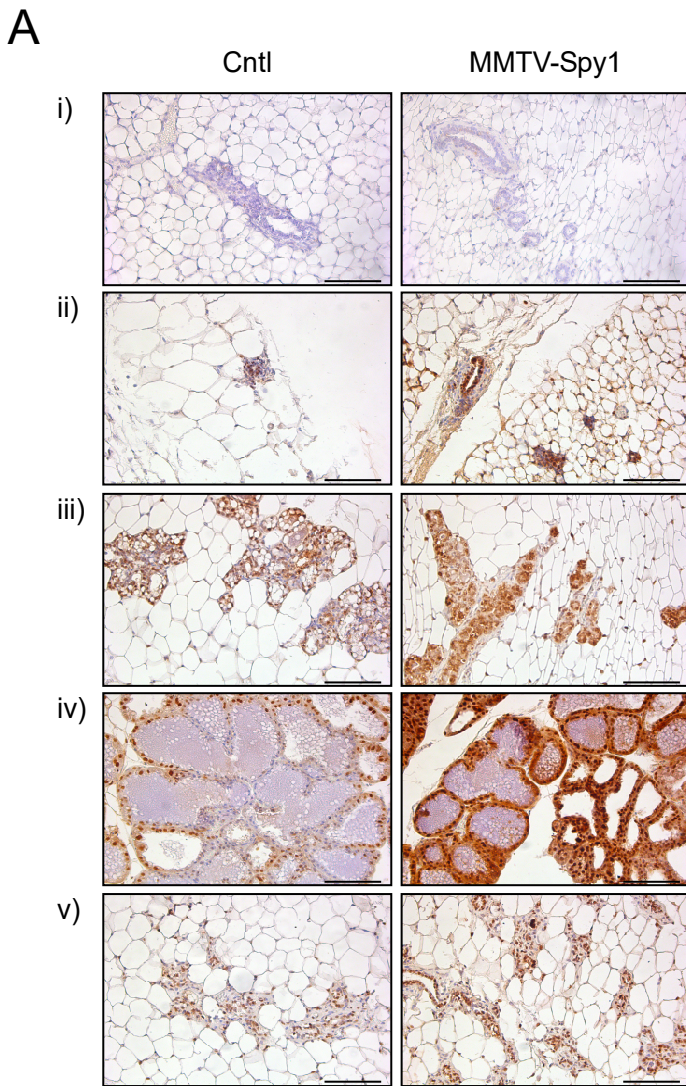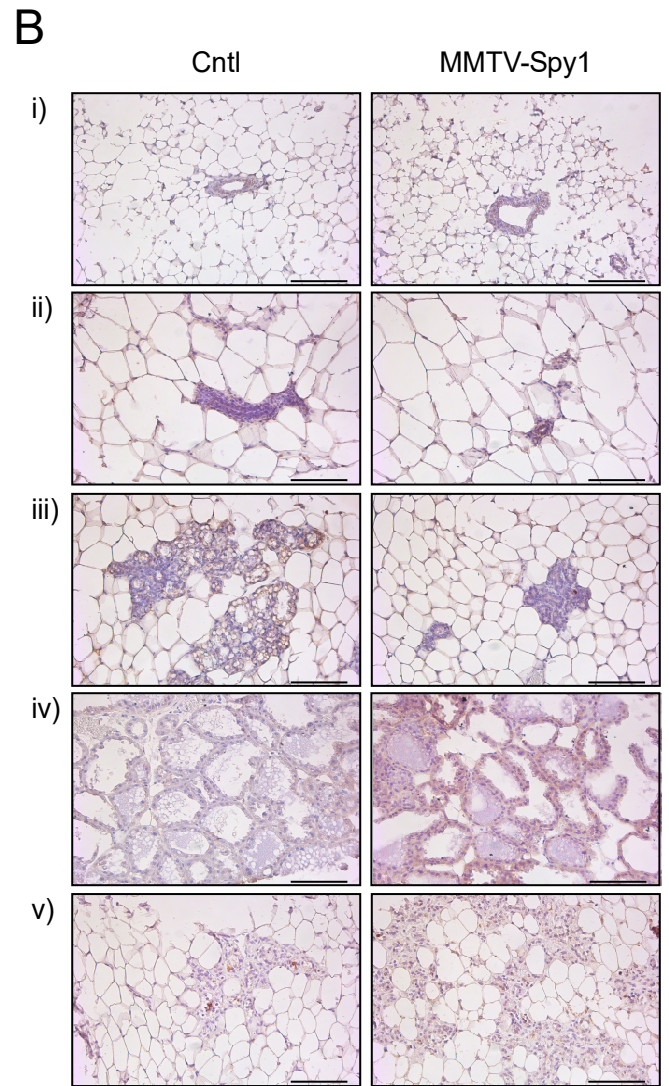

Figure S4

A

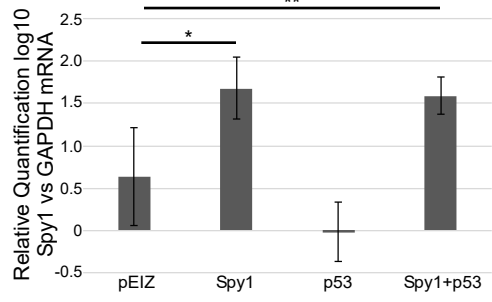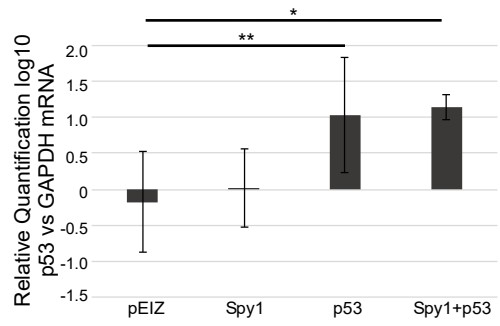

B

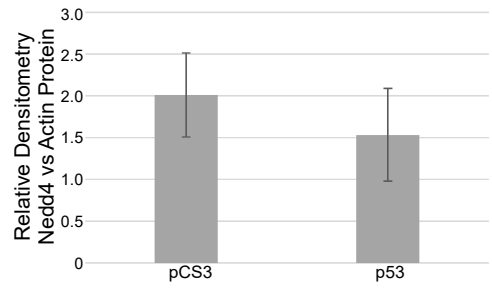

C

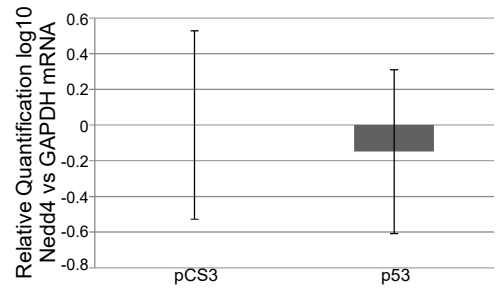

Figure S5

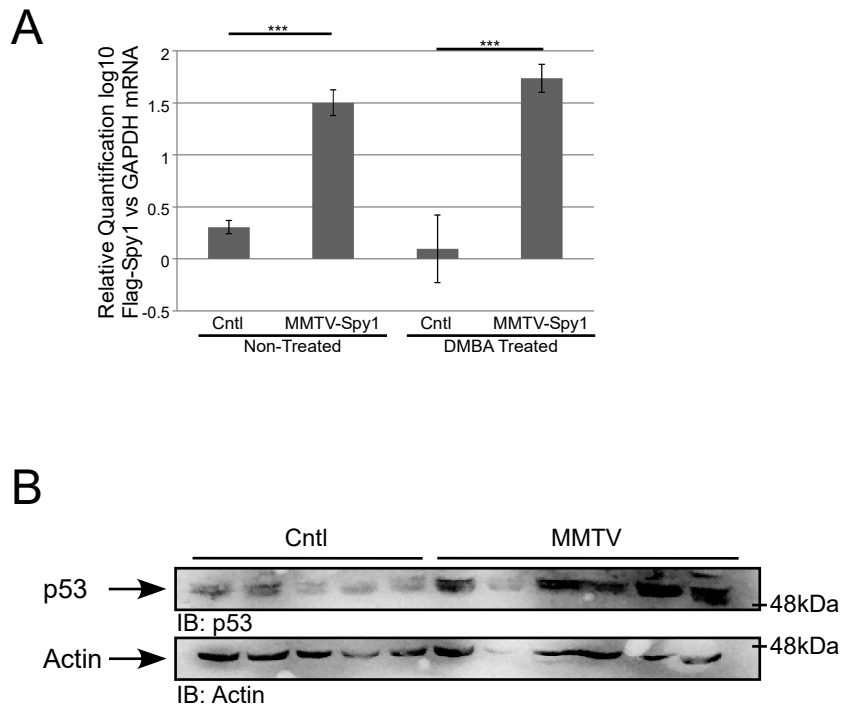

Supplement: Supplementary file [file media-1.pdf]
